1  
2  
3  
4  
5  
6  
7  
8  
9  
10  
11  
12  
13  
14  
15  
16  
17  
18  
19  
20  
21  
22

**Dystroglycan N-terminal domain enables LARGE1 to extend matriglycan on  $\alpha$ -dystroglycan and prevents muscular dystrophy**

**Hidehiko Okuma<sup>1</sup>, Jeffrey M. Hord<sup>1</sup>, Ishita Chandel<sup>1</sup>, David Venzke<sup>1</sup>, Mary E. Anderson<sup>1</sup>,  
Ameya S. Walimbe<sup>1</sup>, Soumya Joseph<sup>1</sup>, Zeita Gastel<sup>1</sup>, Yuji Hara<sup>2</sup>, Fumiaki Saito<sup>3</sup>,  
Kiichiro Matsumura<sup>3</sup>, and Kevin P. Campbell<sup>1\*</sup>**

<sup>1</sup>Howard Hughes Medical Institute, Senator Paul D. Wellstone Muscular Dystrophy Specialized Research Center, Department of Molecular Physiology and Biophysics and Department of Neurology, Roy J. and Lucille A. Carver College of Medicine, The University of Iowa, Iowa City, Iowa 52242, USA

<sup>2</sup>Department Pharmaceutical Sciences, School of Pharmaceutical Sciences, University of Shizuoka, Shizuoka 4228526, Japan

<sup>3</sup>Department of Neurology, School of Medicine, Teikyo University, Tokyo 1738606, Japan

\* Corresponding author

23 **Abstract**

24           Dystroglycan (DG) requires extensive post-translational processing to function as a  
25 receptor for extracellular matrix proteins containing laminin-G-like (LG) domains. Matriglycan  
26 is an elongated polysaccharide of alternating xylose and glucuronic acid that is uniquely  
27 synthesized on  $\alpha$ -dystroglycan ( $\alpha$ -DG) by like-acetylglucosaminyltransferase-1 (LARGE1) and  
28 binds with high affinity to matrix proteins like laminin. Defects in the post-translational  
29 processing of  $\alpha$ -DG that result in a shorter form of matriglycan reduce the size of  $\alpha$ -DG and  
30 decrease laminin binding, leading to various forms of muscular dystrophy. However, little is  
31 known regarding mechanisms that generate full-length matriglycan on  $\alpha$ -DG (~150-250 kDa).  
32 Here, we show that LARGE1 can only synthesize a short, non-elongated form of matriglycan in  
33 mouse skeletal muscle that lacks the DG N-terminus ( $\alpha$ -DGN), resulting in a ~100-125 kDa  $\alpha$ -  
34 DG. This smaller form of  $\alpha$ -DG binds laminin and maintains specific force but does not prevent  
35 muscle pathophysiology, including reduced force induced by eccentric contractions and  
36 abnormalities in neuromuscular junctions. Collectively, our study demonstrates that  $\alpha$ -DGN is  
37 required for LARGE1 to extend matriglycan to its full mature length on  $\alpha$ -DG and thus prevent  
38 muscle pathophysiology.

## 39 Introduction

40 The basement membrane is a specialized network of extracellular matrix macromolecules  
41 that surrounds epithelium, endothelium, muscle, fat, and neurons (*Rowe and Weiss, 2008*).  
42 Skeletal muscle cells are bound to the basement membrane through transmembrane receptors,  
43 including dystroglycan (DG) and the integrins, which help maintain the structural and functional  
44 integrity of the muscle cell membrane (*Roberts et al., 1985; Sonnenberg et al., 1988;*  
45 *Ibraghimov-Beskrovnaya et al., 1992; Han et al., 2009*). DG is a central component of the  
46 dystrophin-glycoprotein complex (DGC). It is encoded by a single gene, DAG1, and cleaved into  
47  $\alpha$ - and  $\beta$ -subunits ( $\alpha$ -DG and  $\beta$ -DG, respectively) by post-translational processing (*Ibraghimov-*  
48 *Beskrovnaya et al., 1992*). Extensive O-glycosylation of  $\alpha$ -dystroglycan ( $\alpha$ -DG) is required for  
49 normal muscle function, and defects in this process result in various forms of muscular  
50 dystrophy. (*Michele et al., 2002; Yoshida-Moriguchi and Campbell, 2015*)

51  $\alpha$ -DG binds to ECM ligands containing laminin-G domains (e.g., laminin, agrin,  
52 perlecan) that are essential components of the basement membrane (*Michele et al., 2002*). DG,  
53 therefore, physically links the cell membrane to the basement membrane. This process requires  
54 synthesis of matriglycan, a heteropolysaccharide [-GlcA- $\beta$ 1,3-Xyl- $\alpha$ 1,3-]<sub>n</sub>, on  $\alpha$ -DG by the  
55 bifunctional glycosyltransferase, like-acetylglucosaminyltransferase-1 (LARGE1) (*Chiba et al.,*  
56 *1997; Michele et al., 2002; Inamori et al., 2012; Yoshida-Moriguchi and Campbell, 2015;*  
57 *Hohenester, 2019; Michele et al., 2002; Ohtsubo and Marth, 2006*). O-glycosylation and the  
58 glycosylation-specific kinase, Protein O-Mannose Kinase (POMK), which phosphorylates  
59 mannose of the core M3 trisaccharide (GalNAc- $\beta$ 1,3-GlcNAc- $\beta$ 1,4-Man), are required to  
60 produce full-length, high-molecular weight forms of matriglycan (*Yoshida-Moriguchi and*  
61 *Campbell, 2015; Hohenester, 2019; Jae et al., 2013; Yoshida-Moriguchi et al., 2013; Zhu et*  
62 *al., 2016*). In the absence of phosphorylation of core M3 by POMK, LARGE1 synthesizes a

63 short, non-elongated form of matriglycan on  $\alpha$ -DG (*Walimbe et al., 2020*). Notably, a loss of  
64 function in the post-translational addition of matriglycan causes dystroglycanopathies, which are  
65 congenital and limb-girdle muscular dystrophies with or without brain and eye abnormalities.  
66 Disease severity is dependent on the ability of matriglycan to bind ECM ligands, which is  
67 dictated by its length and expression (*Goddeeris et al., 2013*): matriglycan that is low molecular  
68 weight (e.g., short) can cause muscular dystrophy, even if its capacity to bind laminin-G domains  
69 is not completely lost (*Puckett et al., 2009; Hara et al., 2011; Carss et al., 2013; Cirak et al.,*  
70 *2013; Dong et al., 2015; Walimbe et al., 2020*). However, the regulation of matriglycan  
71 elongation by factors other than POMK is still unknown.

72  $\alpha$ -DG is composed of three distinct domains: the N-terminal ( $\alpha$ -DGN) domain, a central  
73 mucin-like domain, and the C-terminal domain (*Figure 1*) (*Brancaccio et al., 1995*).  $\alpha$ -DGN  
74 functions as a binding site for LARGE1 in the Golgi and is required for the functional  
75 glycosylation of the mucin-like domain of  $\alpha$ -DG (*Kanagawa et al., 2004*). Therefore, we  
76 hypothesized that  $\alpha$ -DGN must be involved in regulating the production and elongation of  
77 matriglycan. Here, we used a multidisciplinary approach to show that LARGE1 synthesizes a  
78 non-elongated form of matriglycan on DG that lacks  $\alpha$ -DGN (i.e.,  $\alpha$ -DGN-deleted dystroglycan)  
79 resulting in ~100-125 kDa  $\alpha$ -DG. This short form of matriglycan binds laminin and maintains  
80 muscle-specific force. However, it fails to prevent lengthening contraction-induced reduction in  
81 force, neuromuscular junction abnormalities, or dystrophic changes in muscle, as these effects  
82 require the expression of  $\alpha$ -DG with the matriglycan modification that is at least 150 kDa.  
83 Therefore, this study shows that LARGE1 requires  $\alpha$ -DGN to generate full-length (~150-250  
84 kDa) matriglycan in skeletal muscle, but synthesis of a shorter form of matriglycan still occurs in  
85 the absence of this domain.

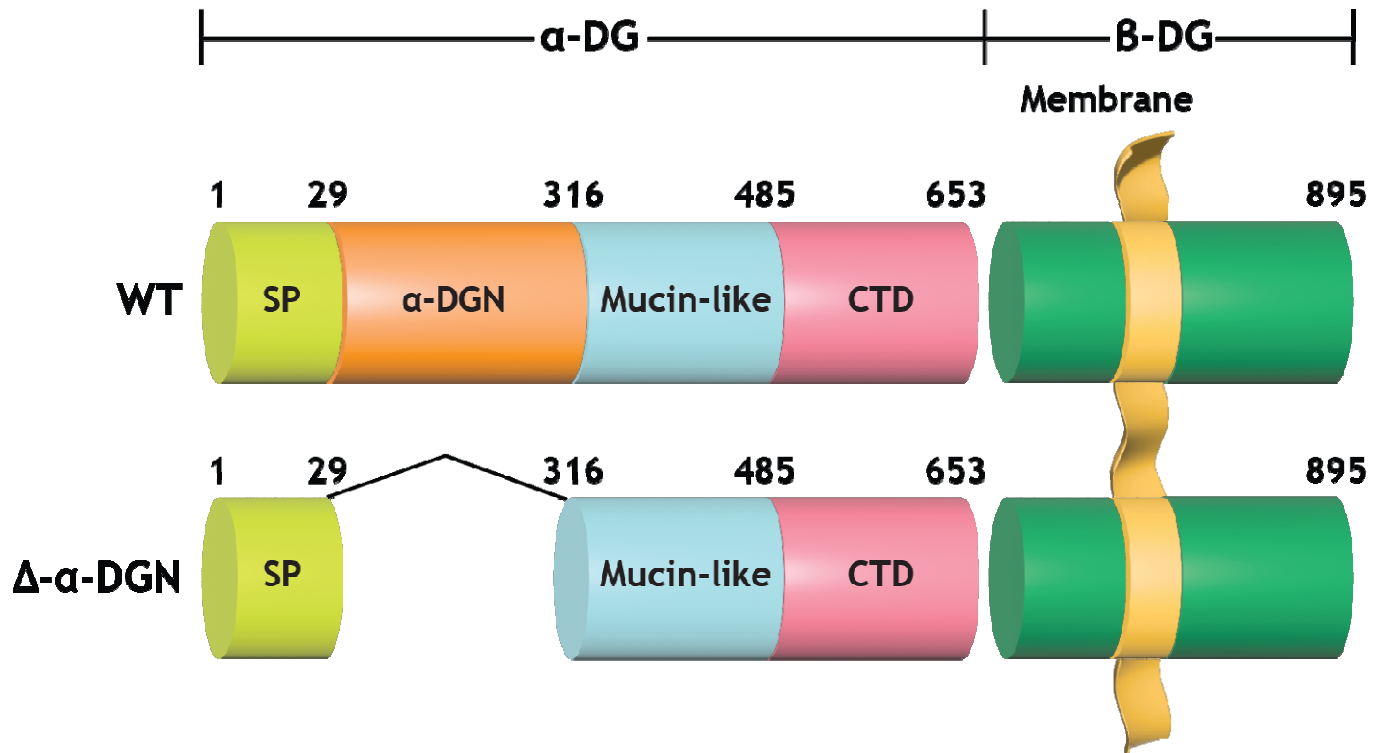

86

87 **Figure 1. Domain structure of DG and  $\Delta\text{-}\alpha\text{-DG}$ .** Wild-type DG is a pre-proprotein with an  
88 N-terminal signal peptide (light green) that is translated in the rough endoplasmic reticulum. The  
89 globular N-terminal domain ( $\alpha\text{-DGN}$ ; orange) is present in wild-type DG but absent in the  
90 mutant ( $\Delta\text{-}\alpha\text{-DG}$ ). The junction between  $\alpha\text{-DGN}$  and the mucin-like domain (light teal)  
91 contains a furin convertase site. The globular extracellular C-terminal domain (CTD; pink)  
92 contains a SEA (sea urchin sperm protein, enterokinase and agrin) autoproteolysis site, which  
93 cleaves pro-DG into  $\alpha\text{-DG}$  and  $\beta\text{-DG}$  (green). Glycosylation has been omitted for clarity.

94 **Results**

95 To ablate  $\alpha$ -DGN in skeletal muscle, we used mice expressing Cre recombinase under the  
96 control of the *paired box 7 (Pax7)* promoter ( $Pax7^{Cre}$ ), floxed DG mice ( $Dag1^{lox/lox}$ ), and  
97 heterozygous  $\alpha$ -DGN deleted mice ( $Dag1^{wt/\Delta\alpha-DGN}$ ) to generate  $Pax7^{Cre} Dag1^{lox/\Delta\alpha-DGN}$  (M- $\alpha$ -DGN  
98 KO) mice (**Figure 2**). Constitutive deletion of DG in mice causes embryonic lethality due to the  
99 absence of Reichert's membrane, an extraembryonic basement membrane required for *in utero*  
100 development (*Williamson et al., 1997*). Deletion of  $\alpha$ -DGN in mice also causes embryonic  
101 lethality (*de Greef et al., 2019*). However, mice that are heterozygous for  $\alpha$ -DGN deletion are  
102 viable and express  $\alpha$ -DG of two different sizes (**Figure 2-figure supplement 1**) corresponding to  
103 both wild-type (WT) and the  $\alpha$ -DGN-deleted ( $\Delta\alpha$ -DGN) forms of DG.

104 To evaluate the gross phenotype of mice expressing only  $\alpha$ -DGN-deleted DG in skeletal  
105 muscle (i.e., M- $\alpha$ -DGN KO mice), we first measured body weight and grip strength. M- $\alpha$ -DGN  
106 KO mice were lower in weight than WT littermates (control) mice at 12 weeks and they  
107 exhibited decreased forelimb grip strength (**Figure 2A**). To determine whether deletion of  $\alpha$ -  
108 DGN affects matriglycan expression, we performed histological analysis of quadriceps muscle  
109 from control or M- $\alpha$ -DGN KO mice. M- $\alpha$ -DGN KO mice showed characteristic features of  
110 muscular dystrophy, including an increase in centrally nucleated fibers (**Figure 2B**).  
111 Immunofluorescence analyses of M- $\alpha$ -DGN KO muscle showed reduced levels of matriglycan  
112 relative to controls, but a similar expression of  $\beta$ -DG, the transmembrane subunit of DG (**Figure**  
113 **2B**).

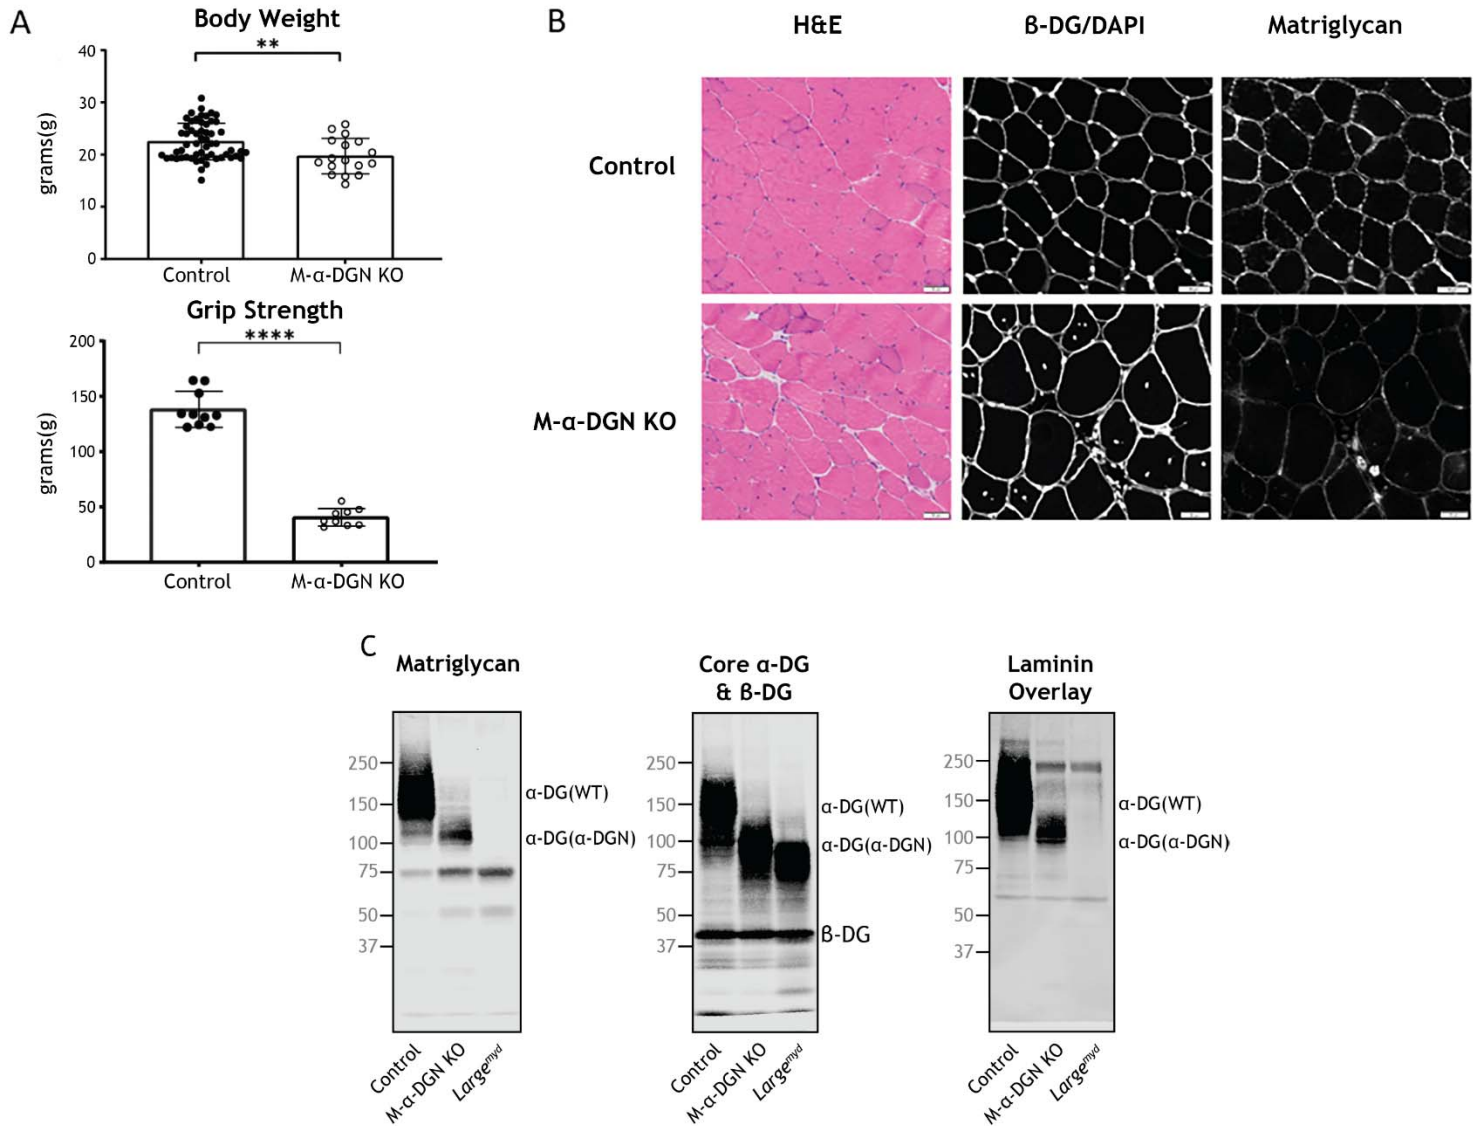

114  
 115 **Figure 2. Characterization of muscle-specific  $\alpha$ -DGN-deficient mice** (A) Body weight and  
 116 grip strength of 12-week-old WT littermates (control) and M- $\alpha$ -DGN KO mice. Double and  
 117 quadruple asterisks: statistical significance determined by Student's unpaired t-test (\*\*p-  
 118 value=0.005, \*\*\*\*p-value<0.0001). (B) Histological analyses of quadriceps muscles from 12-  
 119 week-old control and M- $\alpha$ -DGN KO mice. Sections stained with H&E or used for  
 120 immunofluorescence to detect  $\beta$ -DG (affinity purified rabbit anti- $\beta$ -DG), DAPI, and matriglycan  
 121 (IIIH6). (C) Immunoblot analysis of quadriceps skeletal muscle from control, M- $\alpha$ -DGN KO, and  
 122 *myd* mice. Glycoproteins were enriched using wheat-germ agglutinin (WGA)-agarose with 10  
 123 mM EDTA. Immunoblotting was performed to detect matriglycan (IIIH11), core  $\alpha$ -DG,  $\beta$ -DG  
 124 (AF6868), and laminin overlay.  $\alpha$ -DG in WT control muscle ( $\alpha$ -DG (WT)) and  $\alpha$ -DG in  $\alpha$ -DGN-  
 125 deficient muscle ( $\alpha$ -DG ( $\Delta\alpha$ -DGN)) are indicated on the right. Molecular weight standards in  
 126 kilodaltons (kDa) are shown on the left.

127 Immunoblot analysis of skeletal muscle from M- $\alpha$ -DGN KO mice demonstrated  
128 expression of a shorter form of matriglycan resulting in a ~100-125 kDa  $\alpha$ -DG, a decrease in the  
129 molecular weight of the core  $\alpha$ -DG, and no change in  $\beta$ -DG (**Figure 2C**). No matriglycan is seen  
130 in *myd* mice which have a deletion in *Large1* (**Figure 2C**). To investigate how the loss of  $\alpha$ -  
131 DGN affected ligand binding, we performed a laminin overlay using laminin-111. Skeletal  
132 muscle from control mice showed a broad band centered at ~100-250 kDa, indicative of  $\alpha$ -DG-  
133 laminin-binding; in contrast, we observed laminin-binding at ~100-125 kDa in M- $\alpha$ -DGN KO  
134 skeletal muscle (**Figure 2c**). To further confirm that the ~100-125 kDa band seen with anti-  
135 matriglycan antibodies in M- $\alpha$ -DGN KO muscle is matriglycan, we digested it overnight with  $\beta$ -  
136 glucuronidase (*Thermotoga maritima*) and  $\alpha$ -xylosidase (*Sulfolobus solfataricus*). Immunoblot  
137 analysis after digestion with anti-matriglycan antibodies or laminin overlay revealed that the  
138 ~100-125 kDa was completely lost, indicating that the ~100-125 kDa band is indeed matriglycan  
139 on  $\alpha$ -DG (**Figure 2-figure supplement 2**).

140 The neuromuscular junctions (NMJs) in adult control mice showed a normal pretzel-like  
141 shape whereas NMJs from M- $\alpha$ -DGN KO mice displayed a variety of abnormalities, including a  
142 granular appearance and AChR-rich streaks extending beyond the pre-synaptic terminal (**Figure**  
143 **3**). Postsynaptic morphology in adult M- $\alpha$ -DGN KO mice was predominately irregular in the  
144 tibialis anterior (TA), extensor digitorum longus (EDL), and soleus (SOL) muscles (**Figure 3**).  
145 Although the overall synaptic size did not differ between controls and M- $\alpha$ -DGN KO mice, the  
146 dispersion of AChR clusters was greater in the M- $\alpha$ -DGN KOs (**Figure 3**), in line with an  
147 increased percentage of plaque-like formations and AChR extensions that projected beyond the  
148 nerve terminal. Despite the post-synaptic abnormalities, all NMJs from M- $\alpha$ -DGN KO mice  
149 were fully innervated.



150 To determine the effect that the loss of  $\alpha$ -DGN has on muscle force production, we  
151 characterized the phenotype and function of extensor digitorum longus (EDL) muscles in 12-17-  
152 week-old WT (control) and M- $\alpha$ -DGN KO mice. Specifically, we measured muscle mass,  
153 muscle cross-sectional area (CSA), production of absolute isometric tetanic force, specific force,  
154 and lengthening contraction-induced reduction in force. Muscle mass and CSA were comparable  
155 between control and M- $\alpha$ -DGN KO mice (**Figure 4A and B**). Although the production of  
156 absolute isometric tetanic force was significantly lower in M- $\alpha$ -DGN KO mice than in control  
157 mice (**Figure 4C**), specific forces were comparable between the two groups when normalized to  
158 muscle CSA (**Figure 4D**). Lengthening contraction-induced reduction in force for M- $\alpha$ -DGN  
159 KO EDL remained greater than those from control EDL for the entire 60 minutes that muscles  
160 were assessed (**Figure 4E**). These results suggest that the short form of matriglycan on  $\alpha$ -DG in  
161 M- $\alpha$ -DGN KO mice enables force production but cannot prevent force reduction caused by  
162 lengthening contractions. POMK KO skeletal muscle also expresses a short form of matriglycan,  
163 similar to M- $\alpha$ -DGN KO muscle, which maintains force production but cannot prevent  
164 lengthening contraction-induced force decline (**Walimbe et al., 2020**). Therefore, we compared  
165 the muscle function of EDL muscles from POMK KO mice with those from M- $\alpha$ -DGN KO *ex*  
166 *vivo*. We did not observe significant differences in lengthening contraction-induced force deficits  
167 between the two mouse strains (**Figure 4-figure supplement 1**). These results suggest that  
168 matriglycan of a similar molecular weight exhibits similar muscle force production and  
169 lengthening contraction-induced force decline.

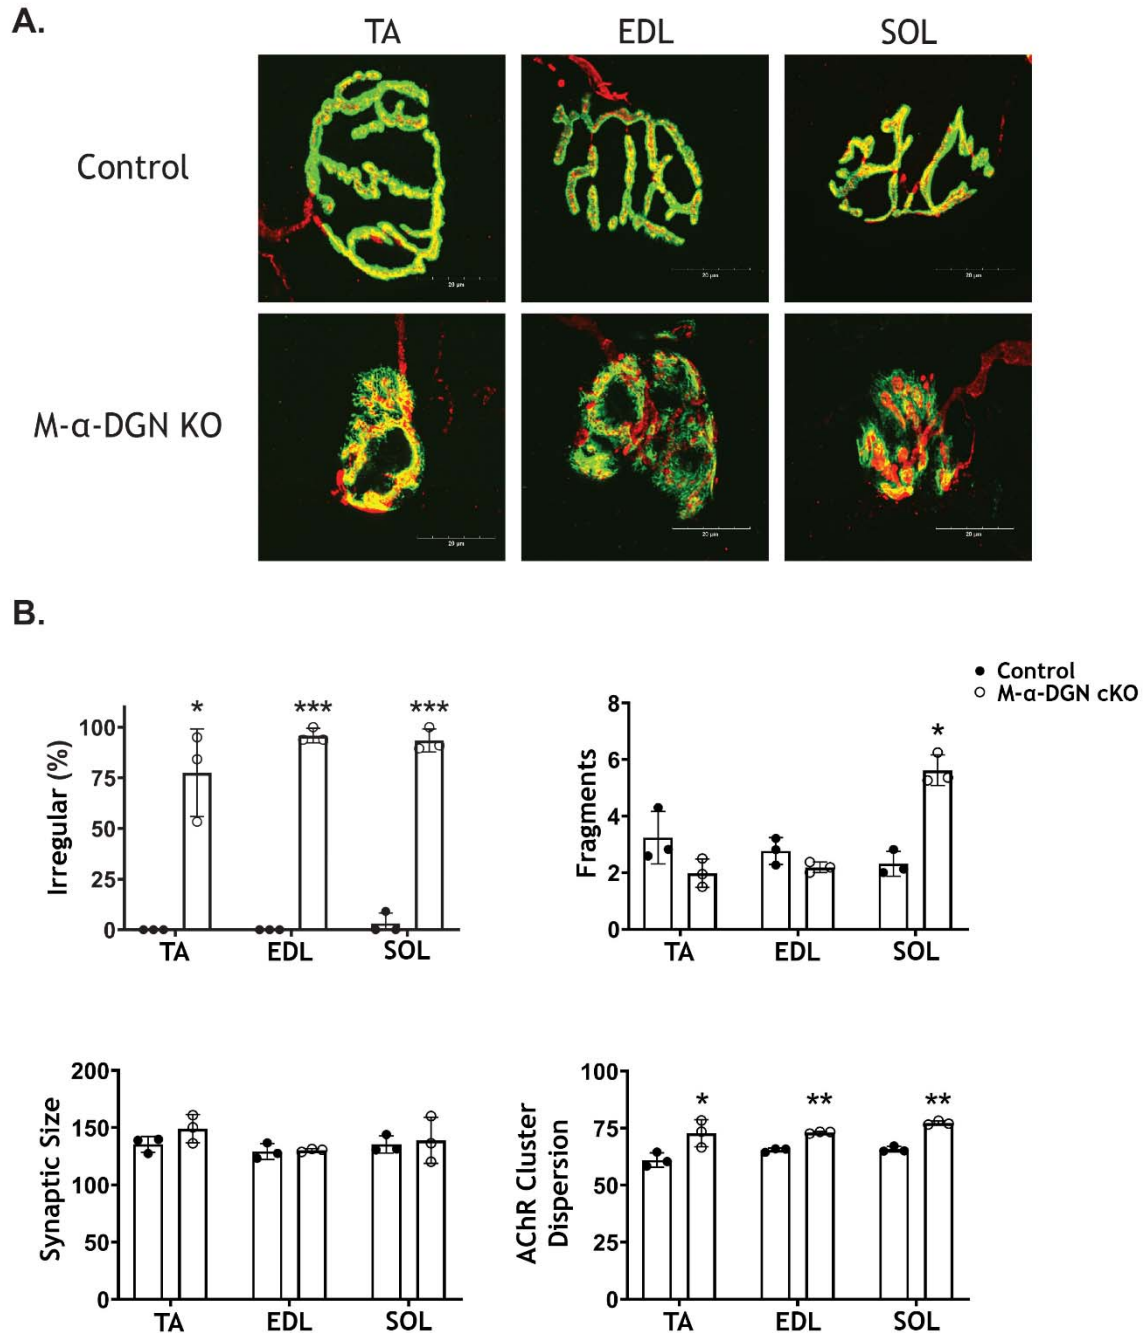

170  
171 **Figure 3.  $\alpha$ -DGN deficiency results in postsynaptic defects.** Neuromuscular junctions (NMJs)  
172 from tibialis anterior (TA), extensor digitorum longus (EDL), and soleus (SOL) muscles  
173 obtained from 35-39-week-old adult control and M- $\alpha$ -DGN KO mice. (A) Representative images  
174 of post-synaptic terminals ( $\alpha$ -BTX-488; green), motor axons (anti-neurofilament-H; red), and  
175 pre-synaptic terminals (anti-synaptophysin; red) from TA, EDL, and SOL muscles. Scale bars =  
176 20  $\mu$ m. (B) Scoring of postsynaptic defects by blinded observers (scoring criteria described in  
177 Methods). Statistical significance determined by Student's unpaired t-test; \* p-value < 0.05; \*\*  
178 p-value < 0.001; \*\*\* p-value < 0.0001.

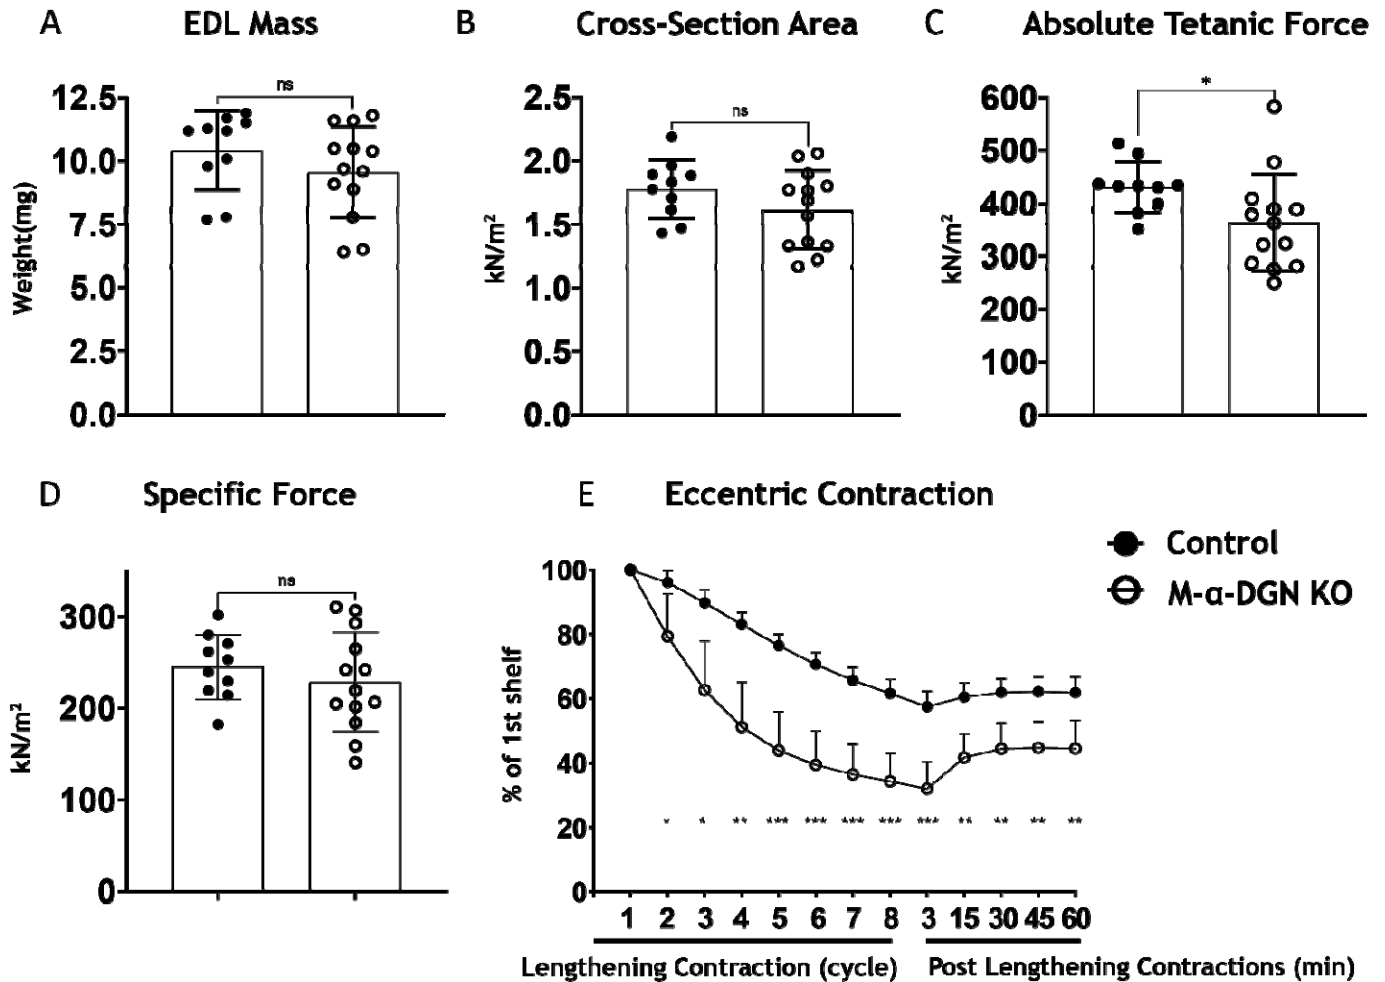

179

180 **Figure 4.  $\alpha$ -DGN-deficient Extensor Digitorum Longus (EDL) muscle demonstrates a**  
 181 **decline in lengthening contraction-induced force.** (A) Weight (milligrams) of EDL muscles  
 182 from WT littermates (controls) and M- $\alpha$ -DGN KO mice;  $p=0.2469$ , as determined by Student's  
 183 unpaired t-test. (B) Cross-sectional area of EDL muscles;  $p=0.1810$ , as determined by Student's  
 184 unpaired t-test. (C) Maximum absolute tetanic force production in EDL muscles.  $p=0.0488$ , as  
 185 determined by Student's unpaired t-test. (D) Specific Force production in EDL muscles;  
 186  $p=0.4158$ , as determined by Student's unpaired t-test. (E) Force deficit and force recovery after  
 187 eccentric contractions in EDL muscles from 12- to 17-week-old male & female control (closed  
 188 circles;  $n=7$ ) and M- $\alpha$ -DGN KO (open circles;  $n=7$ ) mice. \* $p<0.05$ ; \*\* $p<0.01$ ; \*\*\* $p<0.001$ , as  
 189 determined by Student's unpaired t-test of at any given lengthening contractions cycle. Bars  
 190 represent the mean +/- the standard deviation.

191 We next determined if exogenous DG lacking  $\alpha$ -DGN (**Figure 5**) produces the short form  
192 of matriglycan. We first produced muscle-specific DG KO mice to achieve muscle-specific  
193 deletion of DG. To do this, we used mice expressing Cre under control of the paired box 7  
194 (Pax7) promoter (Pax7-Cre) and *Dag1*<sup>flox/flox</sup> mice to generate Pax7Cre; *Dag1*<sup>flox/flox</sup> (M-*Dag1*  
195 KO) mice. To assess muscle function, we evaluated muscle-specific force and lengthening  
196 contraction-induced reduction in force *ex vivo*, which showed that muscle-specific force was  
197 significantly decreased and that muscles were more susceptible to lengthening contraction-  
198 induced force decline in the absence of DG (**Figure 5-figure supplement 1**). Collectively, these  
199 results show that M-*Dag1* KO mice harbor a more complete deletion of DG in muscle than the  
200 previously generated mouse model (MCK-Cre *Dag1*<sup>flox/flox</sup>) harboring muscle-specific deletion of  
201 DG (**Cohn et al., 2002**). To assess the presence of DG, we performed immunostaining of  
202 quadriceps muscles from 12-week-old M-*Dag1* KO mice, which showed the absence of DG-  
203 positive fibers (**Figure 5-figure supplement 1**). Immunoblot analysis showed that matriglycan  
204 and  $\alpha$ -DG derived from skeletal muscle were not observed in M-*Dag1* KO mice (**Figure 5-  
205 figure supplement 1**). This is consistent with prior reports showing that only peripheral-nerve  
206 derived matriglycan of 110 kDa is observed in M-*Dag1* KO mice in the presence of EDTA,  
207 which improves the extraction of matriglycan positive  $\alpha$ -DG and acts as a protease inhibitor by  
208 chelating calcium (**Saito et al., 2003**).

209 We next generated an adeno-associated virus (AAV) construct of DG lacking the  $\alpha$ -DGN  
210 (AAV-MCK DG-E; **Figure 5A**), which we injected into M-*Dag1* KO mice through the retro-  
211 orbital sinus. A previous report found that matriglycan was not produced when a similar  
212 adenovirus construct of DG lacking the  $\alpha$ -DGN was used to infect ES cells (**Kanagawa et al.,  
213 2004**). However, we found that matriglycan of similar size was produced in M-*Dag1* KO mice

214 injected with AAV-MCK DG-E as in M- $\alpha$ -DGN KO mice (**Figure 5**). Immunofluorescence  
215 analysis of quadriceps muscle from M-*Dag1* KO mice injected with AAV-MCK DG-E showed  
216 decreased immunoreactivity to matriglycan-positive muscle fibers but restored expression of  $\beta$ -  
217 DG (**Figure 5B**). Immunoblot analysis of skeletal muscle from M-*Dag1* KO mice injected with  
218 AAV-MCK-DG-E showed expression of  $\alpha$ -DG containing matriglycan around ~100-125 kDa  
219 (**Figure 5C**), which was the same size as  $\alpha$ -DG with matriglycan in M- $\alpha$ -DGN KO (**Figure 2C**).  
220 The molecular weight of  $\alpha$ -DG was decreased in muscle from these mice, similar to that  
221 observed in M- $\alpha$ -DGN KO mice, whereas the molecular weight of  $\beta$ -DG was unchanged relative  
222 to M- $\alpha$ -DGN KO mice (**Figure 2C**). We also observed laminin-binding at ~100-125 kDa in  
223 muscle from M-*Dag1* KO + AAV-MCK DG-E mice (**Figure 5C**). In addition, we assessed the  
224 physiologic effects of expressing DG without the N-terminal domain. We observed that the  
225 specific force was comparable in M-*Dag1* KO + AAV-MCK DG-E and M- $\alpha$ -DGN KO mice  
226 (**Figure 5D**) and that the two groups exhibited similar amounts of lengthening contraction-  
227 induced force decline (**Figure 5E**). Therefore, these data demonstrate that AAV-mediated  
228 delivery of exogenous DG lacking the  $\alpha$ -DGN into an M-*Dag1* KO mouse also produces short  
229 matriglycan and exhibits the same muscle function as M- $\alpha$ -DGN KO mice.

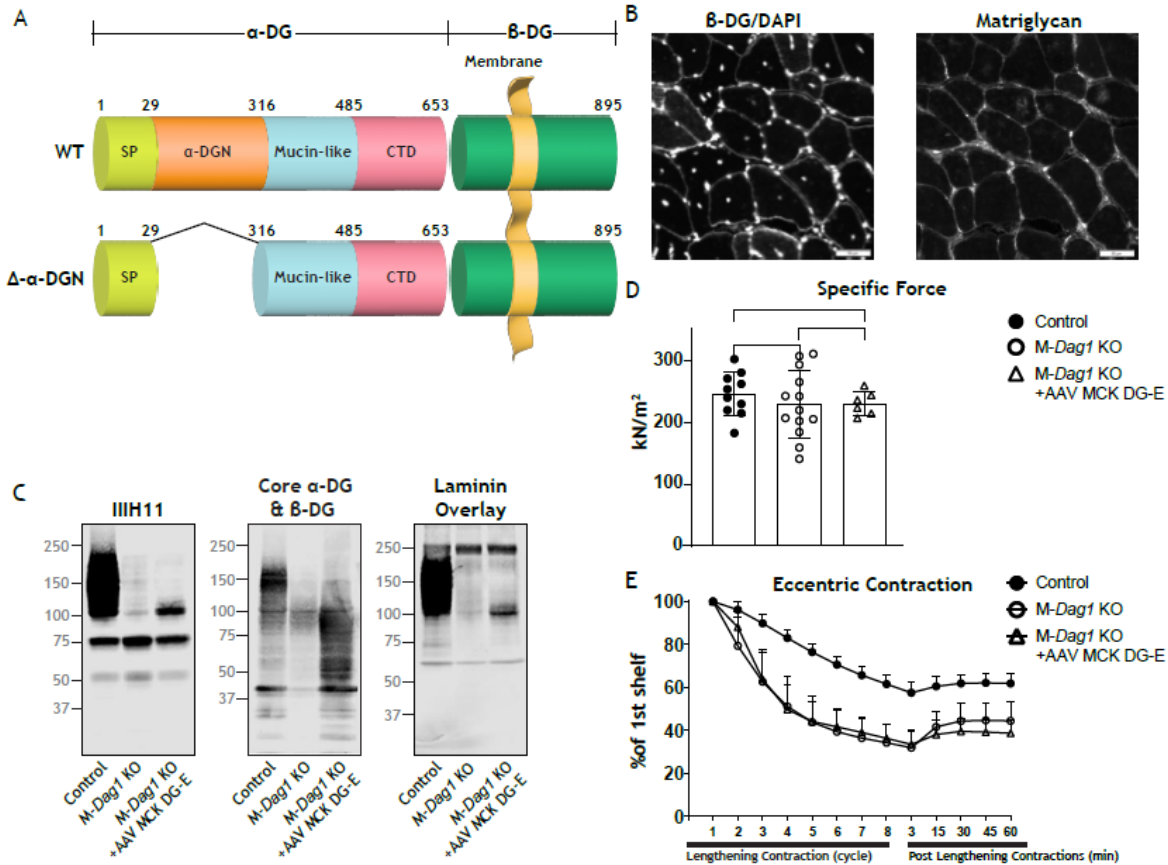

230  
 231 **Figure 5. Exogenous  $\alpha$ -DGN-deficient DG also produces short matriglycans similar to M-**  
 232 ***Dag1* KO mice. (A)** Schematic representation of WT DG, adeno-associated virus (AAV), and a  
 233 mutant DG in which the N-terminal domain has been deleted (DG-E) adeno-associated virus.  $\alpha$ -  
 234 DG is composed of a signal peptide (SP, amino acids 1–29), an N-terminal domain (amino acids  
 235 30–316), a mucin-like domain (amino acids 317–485), and a C-terminal domain (amino acids  
 236 486–653). The green box represents  $\beta$ -DG. **(B)** Immunofluorescence analyses of quadriceps  
 237 muscles from 12-week-old *M-Dag1* KO mice injected with AAV-MCK DG-E to detect  $\beta$ -DG,  
 238 nuclei (DAPI) and matriglycan (IIIH6). **(C)** Immunoblot analysis of skeletal muscle obtained  
 239 from littermate controls (control), *M-Dag1* KO mice or *M-Dag1* KO mice injected with AAV-  
 240 MCK DG-E. Glycoproteins were enriched from quadriceps skeletal muscles using WGA-agarose  
 241 with 10 mM EDTA. Immunoblotting was performed to detect matriglycan (IIIH11), core  $\alpha$ -DG  
 242 and  $\beta$ -DG (AF6868), and laminin (overlay). **(D)** Production of specific force in EDL muscles  
 243 from 12- to 17-week-old male & female *M-Dag1* KO mice (controls; closed circles, n=10); M-  
 244  $\alpha$ -DGN KO mice (open circles, n=13); and *M-Dag1* KO+AAVMCK DG-E mice (open triangles,  
 245 n=6). P-values determined by Student's unpaired t-test; controls vs *M-Dag1* KO: p=0.4158;  
 246 controls vs *M-Dag1* KO+AAVMCK DG-E: p=0.3632; *M-Dag1* KO vs *M-Dag1* KO+AAVMCK  
 247 DG-E: p=0.948. **(E)** Force deficits and recovery in EDL muscles from mice in D. There is no  
 248 significant difference in *M-Dag1* KO vs *M-Dag1* KO+AAVMCK DG-E as determined by  
 249 Student's unpaired t-test at any given lengthening contraction cycle or post-lengthening  
 250 contraction.

251 Our studies show that DG lacking the  $\alpha$ -DGN expresses a short form of matriglycan; this  
252 suggests that  $\alpha$ -DGN is necessary for the production of full-length matriglycan. To test this  
253 hypothesis, we determined if matriglycan expression could be restored in mice lacking  $\alpha$ -DGN.  
254 We injected M- $\alpha$ -DGN KO mice with an AAV expressing  $\alpha$ -DGN (AAV-CMV  $\alpha$ -DGN) and  
255 harvested the skeletal muscles of these mice eight to ten weeks after injection. H&E staining in  
256 M- $\alpha$ -DGN KO mice injected with AAV-CMV  $\alpha$ -DGN was unchanged from M- $\alpha$ -DGN KO mice  
257 (**Figure 2B, 6A**). Quadriceps muscles from M- $\alpha$ -DGN KO mice injected with AAV-CMV $\alpha$ -  
258 DGN showed a reduced intensity of matriglycan relative to LCs (**Figure 6A**). Immunoblot  
259 analysis of these mice showed that matriglycan had a molecular weight of ~100-125 kDa and the  
260 size of  $\alpha$ -DG was shifted down, whereas  $\beta$ -DG remained unchanged (**Figure 6B**). Laminin-  
261 binding was observed at ~100-125 kDa in M- $\alpha$ -DGN KO skeletal muscle infected with AAV-  
262 CMV $\alpha$ -DGN (**Figure 6B**). Collectively, this phenotype is similar to that observed in the skeletal  
263 muscles of M- $\alpha$ -DGN KO mice. Expressing  $\alpha$ -DGN in M- $\alpha$ -DGN KO mice did not alter specific  
264 force or improve force deficits induced by lengthening contractions (**Figure 6C, 6D**). Thus,  
265 supplementing M- $\alpha$ -DGN KO skeletal muscle with  $\alpha$ -DGN fails to improve matriglycan  
266 elongation.

267 To determine if excess LARGE1 produces full-size matriglycan in M- $\alpha$ -DGN KO  
268 muscle, we evaluated immunoblot analysis of skeletal muscle from LCs, M- $\alpha$ -DGN KO, and M-  
269  $\alpha$ -DGN KO mice injected with AAV-MCK-Large1. M- $\alpha$ -DGN KO mice injected with AAV-  
270 MCK-Large1 demonstrated no change in the molecular weight of matriglycan,  $\alpha$ -DG, and  $\beta$ -DG  
271 relative to M- $\alpha$ -DGN KO. A laminin overlay using laminin-111 also showed no change (**Figure**  
272 **6-figure supplement 1**). These results indicate that even if LARGE1 is overexpressed, full-size  
273 matriglycan cannot be produced without  $\alpha$ -DGN.

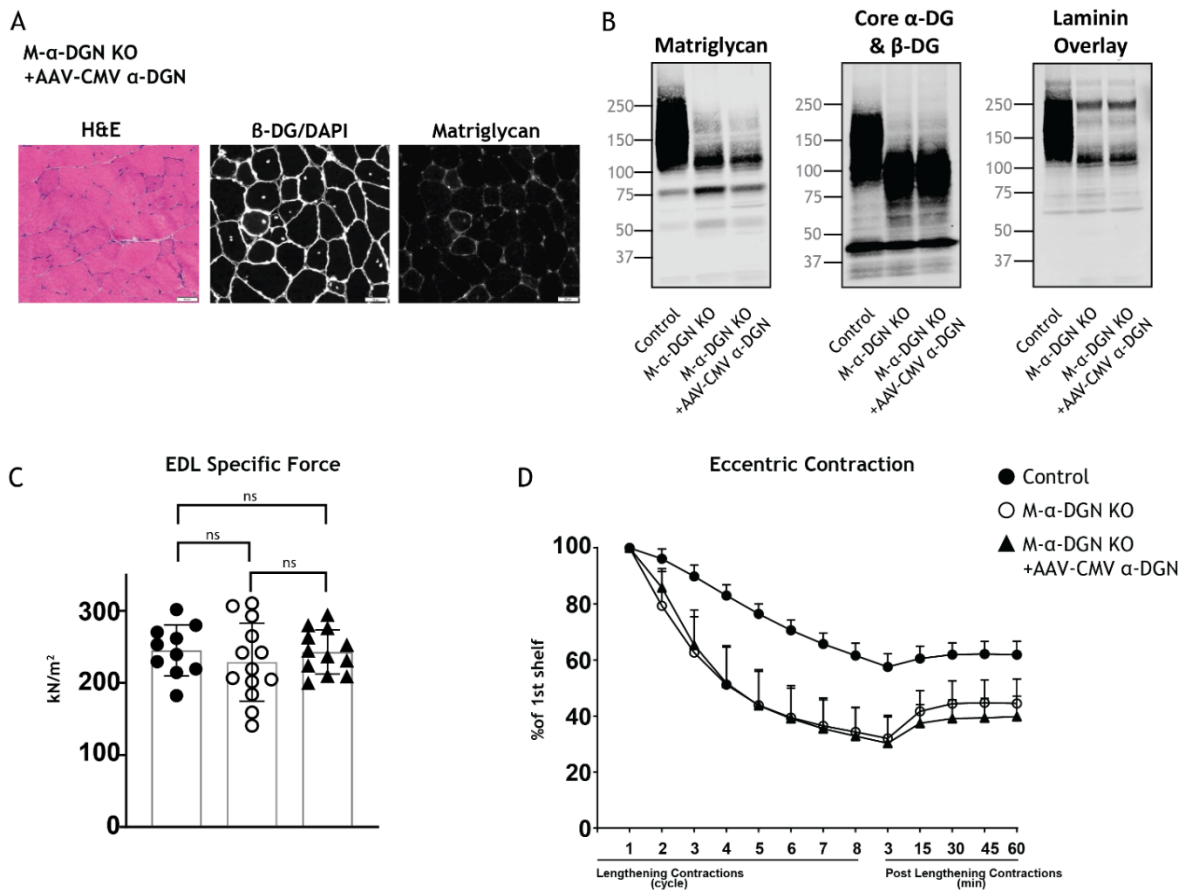

274  
275 **Figure 6. Expression of  $\alpha$ -DGN in M- $\alpha$ -DGN KO mice does not rescue matriglycan**  
276 **elongation.** (A) Representative sections of quadriceps muscles from 17-week-old M- $\alpha$ -DGN KO  
277 mice injected with AAV-CMV  $\alpha$ -DGN. Sections were stained with H&E and  
278 immunofluorescence to detect matriglycan (IIIH6) and  $\beta$ -DG (AP83). (B) Immunoblot analysis of  
279 skeletal muscle obtained from littermate controls or M- $\alpha$ -DGN KO mice and M- $\alpha$ -DGN KO  
280 mice injected with AAV-CMV  $\alpha$ -DGN (M- $\alpha$ -DGN KO+AAV-CMV  $\alpha$ -DGN). Glycoproteins  
281 were enriched using WGA-agarose with 10 mM EDTA. Immunoblotting was performed to  
282 detect matriglycan (IIIH11), core  $\alpha$ -DG and  $\beta$ -DG (AF6868), and laminin overlay. (C)  
283 Production of specific force in EDL muscles from 12- to 17-week-old male & female M- $\alpha$ -DGN  
284 WT littermates (controls; closed circles, n=10); M- $\alpha$ -DGN KO (open circles, n=13); and M- $\alpha$ -  
285 DGN KO+AAV-CMV  $\alpha$ -DGN (closed triangles, n=12). P-values determined by Student's  
286 unpaired t-test; controls vs M- $\alpha$ -DGN KO+AAV-CMV  $\alpha$ -DGN: p=0.8759; controls vs M- $\alpha$ -  
287 DGN KO: p=0.4333; M- $\alpha$ -DGN KO vs M- $\alpha$ -DGN KO+AAV-CMV  $\alpha$ -DGN: p=0.4333. (D)  
288 Force deficit and force recovery after lengthening contractions in EDL muscles from 12- to 17-  
289 week-old male & female M- $\alpha$ -DGN KO WT littermates (controls, closed circles; n=6) and M- $\alpha$ -  
290 DGN KO (KO, open circles; n=7) mice, and in M- $\alpha$ -DGN KO mice injected with AAV-CMV  $\alpha$ -  
291 DGN (KO+AAV-CMV  $\alpha$ -DGN, closed triangles; n=8). There is no significant difference in M-  
292  $\alpha$ -DGN KO vs M- $\alpha$ -DGN KO+AAV-CMV  $\alpha$ -DGN as determined by Student's unpaired t-test at  
293 any given lengthening contractions cycle or post lengthening contractions.



294 The length of matriglycan is correlated with its ability to bind ECM ligands (*Goddeeris et*  
295 *al., 2013*). Therefore, we hypothesized that the susceptibility to force decline by lengthening  
296 contractions would differ depending on the length of matriglycan. To test this, we performed  
297 physiological muscle tests in three different mouse models to determine the difference in  
298 susceptibility to lengthening contraction-induced reduction in force. Specifically, we used: 1) M-  
299  $\alpha$ -DGN KO mice, which express a short form of matriglycan, 2) *Dagl*<sup>T190M</sup> mice, which harbor a  
300 knock-in mutation (T190M) in *DAG1* that inhibits the DG-LARGE1 interaction and leads to  
301 incomplete post-translational modification of  $\alpha$ -DG (*Hara et al., 2011*), and 3) C57BL/6J WT  
302 (C57) mice, which have full-length matriglycan. The percent deficit value of the 8th eccentric  
303 contraction (EC) shows the largest difference in the EC protocol; therefore, we compared these  
304 values between our three different mouse models (*Figure 7A*). M- $\alpha$ -DGN KO mice showed a  
305 significantly higher percent deficit ( $70.2\% \pm 5.7$ ) compared to C57 ( $41.7\% \pm 8.0$ ) and *Dagl*<sup>T190M</sup>  
306 ( $41.6 \pm 6.7$ ) mice, with no difference observed between the latter groups. Immunoblot analysis of  
307 laminin in skeletal muscle showed  $\alpha$ -DG laminin-binding at ~150-250 kDa in skeletal muscle  
308 from C57 mice, ~100-150 kDa in skeletal muscle from *Dagl*<sup>T190M</sup> mice, and ~100-125 kDa in  
309 skeletal muscle from M- $\alpha$ -DGN KO mice (*Figure 7C*). Moreover, the percentage of centrally  
310 nucleated fibers differed significantly in *Dagl*<sup>T190M</sup> ( $1.73\% \pm 0.31$ ) and M- $\alpha$ -DGN KO  
311 ( $9.28\% \pm 2.41$ ) mice compared to C57 mice ( $1.22\% \pm 0.15$ ) (*Figure 7B*). The reduction of laminin-  
312 binding activity of  $\alpha$ -DG is thought to be the main cause of dystroglycanopathy (*Kanagawa et*  
313 *al., 2009; Goddeeris et al., 2013*). Indeed, we observed a reduced binding capacity (relative  
314  $B_{\max}$ ) for laminin-111 in solid-phase binding analyses in skeletal muscle from M- $\alpha$ -DGN KO and  
315 *Dagl*<sup>T190M</sup> mice compared to skeletal muscle from C57 mice (10.7-fold and 2.3-fold difference  
316 relative to WT, respectively) (*Figure 7D*). However, the binding capacity of skeletal muscle

317 from *Dagl*<sup>T190M</sup> and M- $\alpha$ -DGN KO mice was higher than that of *myd* muscle (**Figure 7E**). M- $\alpha$ -  
318 DGN KO and *Dagl*<sup>T190M</sup> also displayed an increase in dissociation constant (**Figure 7E**).  
319 Collectively, these results suggest that  $\alpha$ -DG positive matriglycan of at least ~150 kDa is  
320 sufficient to prevent force decline from lengthening contractions and significant dystrophic  
321 changes, despite a 45% reduction in laminin-binding activity.

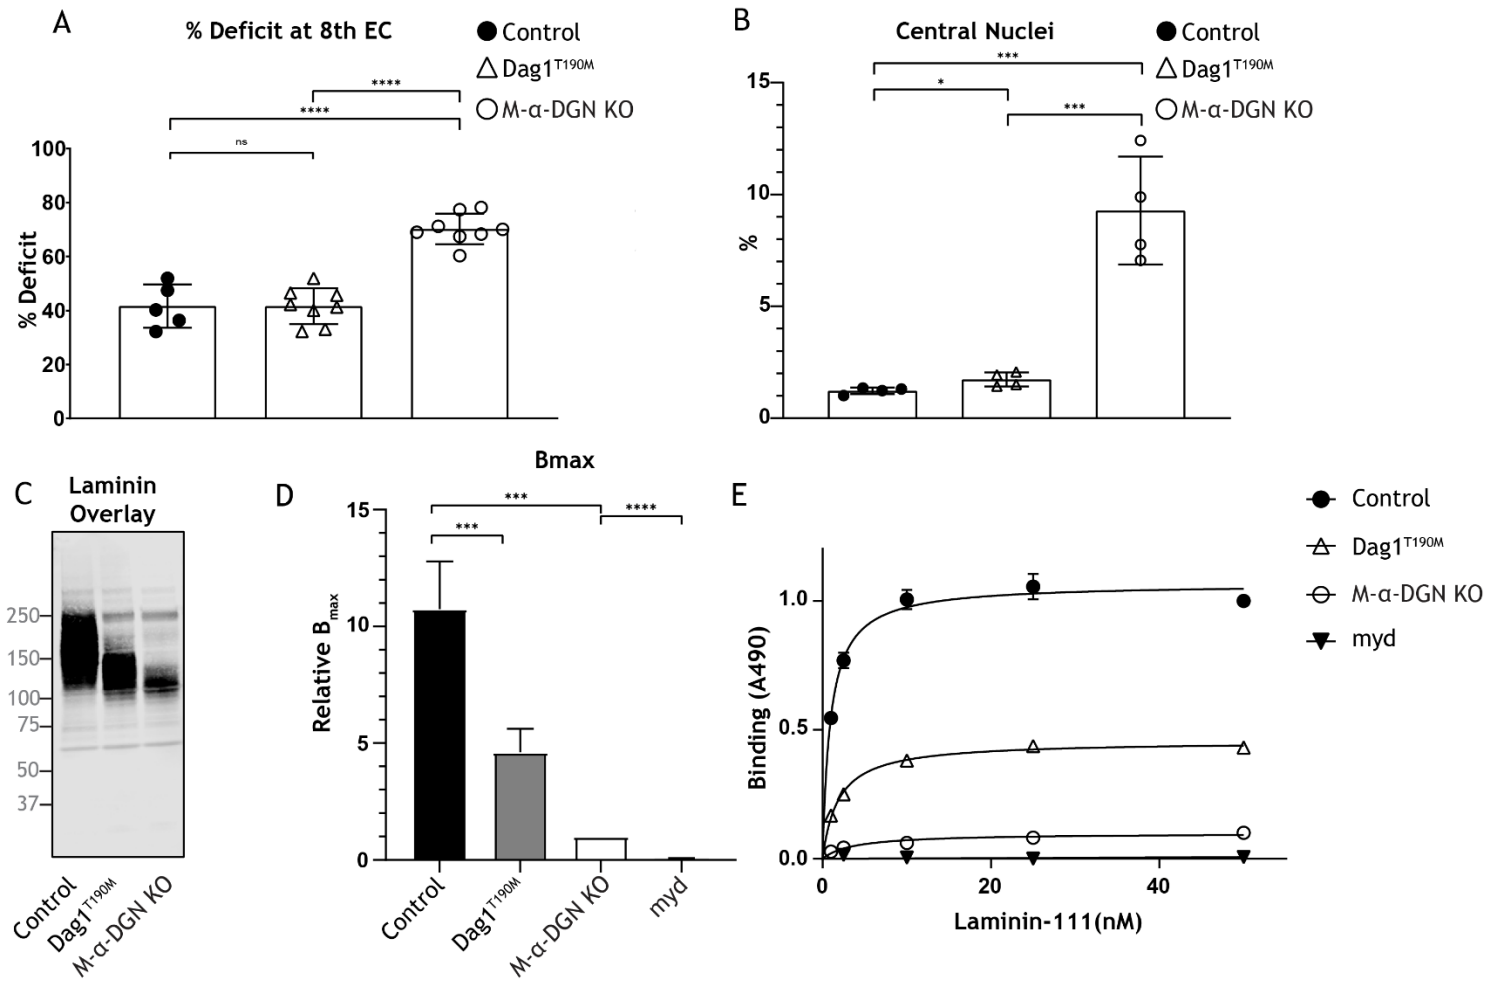

322 **Figure 7. Relationship between matriglycan length and dystrophic phenotype.** (A) % deficit  
 323 of 8<sup>th</sup> eccentric contraction (EC) in EDL muscles from C57BL/6J WT (control), M-α-DGN KO,  
 324 and *Dag1*<sup>T190M</sup> mice. p-values determined by Student's unpaired t-test; control vs *Dag1*<sup>T190M</sup>:  
 325 p=0.0263; control and *Dag1*<sup>T190M</sup> vs M-α-DGN KO: p<0.001. (B) Percentage of muscle fibers  
 326 with central nuclei in 12- to 19-week-old control, *Dag1*<sup>T190M</sup> and M-α-DGN KO mice; n=4 for all  
 327 groups. P-values determined by Student's unpaired t-test; control and *Dag1*<sup>T190M</sup> vs M-α-DGN  
 328 KO: p<0.001; control vs *Dag1*<sup>T190M</sup>: p=0.0263. (C) Immunoblot analysis of quadriceps skeletal  
 329 muscles from control, *Dag1*<sup>T190M</sup> and M-α-DGN KO mice. Glycoproteins were enriched using  
 330 WGA-agarose with 10 mM EDTA. Immunoblotting was performed with laminin (laminin  
 331 overlay). (D) Comparison of average solid-phase determined relative B<sub>max</sub> values for laminin.  
 332 B<sub>max</sub> values for M-α-DGN KO were set to 1 to allow for direct comparisons; error bars indicate  
 333 s.e.m. P-values determined using Student's unpaired t-test; control vs *Dag1*<sup>T190M</sup> and control vs  
 334 M-α-DGN KO: p<0.01, and M-α-DGN KO vs *myd*: p<0.001. (E) Solid-phase analysis of  
 335 laminin-binding using Laminin-111 in skeletal muscle from control, *Dag1*<sup>T190M</sup>, M-α-DGN KO,  
 336 and *myd* KO mice (three replicates for each group). Control K<sub>d</sub>: 0.9664 ± 0.06897 nM;  
 337 *Dag1*<sup>T190M</sup> K<sub>d</sub>: 1.902 ± 0.1994 nM; and M-α-DGN KO K<sub>d</sub>: 2.322 ± 0.6114 nM.

338 **Discussion**

339 Functional glycosylation of  $\alpha$ -DG requires  $\alpha$ -DGN (*Kanagawa et al., 2004; Hara,*  
340 *Kanagawa, et al., 2011*). However, it remains unclear how the loss of  $\alpha$ -DGN affects  
341 matriglycan synthesis. Here, we show that the lack of  $\alpha$ -DGN does not preclude matriglycan  
342 synthesis entirely. Instead, in the absence of  $\alpha$ -DGN, LARGE1 synthesizes a short, non-  
343 elongated form of matriglycan on  $\alpha$ -DG (~100-125 kDa), which demonstrates that the N-  
344 terminal domain is required for matriglycan elongation. Thus, LARGE1- $\alpha$ DGN holds the  
345 enzyme-substrate complex together over multiple cycles of sugar addition. These findings build  
346 on our previous study demonstrating that phosphorylation of the core M3 trisaccharide by  
347 POMK is also necessary for matriglycan elongation (*Walimbe et al., 2020*). Thus, the generation  
348 of full-length mature matriglycan on  $\alpha$ -DG (~150-250 kDa) by *LARGE1* requires both POMK  
349 and  $\alpha$ -DGN to be bound to DG; in the absence of either, a shorter form is generated.

350 In our study, muscle-specific deletion of  $\alpha$ -DGN resulted in the production of short forms  
351 of matriglycan on  $\alpha$ -DG (~100-125 kDa). Mice lacking  $\alpha$ -DGN exhibited low bodyweight and  
352 grip strength, and histological characterization of quadriceps muscles revealed mild muscular  
353 dystrophy and a lack of homogeneous matriglycan expression. Physiological examination  
354 revealed that M- $\alpha$ -DGN KO muscle was susceptible to lengthening contraction-induced force  
355 decline, although specific force was maintained. These results are consistent with those obtained  
356 when  $\alpha$ -DGN-deleted DG was administered to muscle-specific DG KO mice and indicates that  
357 DG lacking  $\alpha$ -DGN produces short forms of matriglycan, which does not prevent dystrophic  
358 muscle changes in this mouse model. Furthermore, DG in the postsynaptic membrane is known  
359 to play a key role in synaptic maturation (*Nishimune et al., 2008*). However, the NMJs in M- $\alpha$ -

360 DGN KO mice in our study were abnormal and irregularly shaped. This indicates both that DG  
361 and matriglycan are required for synaptic maturation.

362         If LARGE1 binding to  $\alpha$ -DGN enables its ability to elongate matriglycan, then we would  
363 expect that rescuing M- $\alpha$ -DGN KO skeletal muscle with  $\alpha$ -DGN would restore the expression of  
364 full-length matriglycan. However, this failed to occur and indicates that solely restoring  $\alpha$ -DGN  
365 expression is not sufficient for LARGE1 to elongate matriglycan. These results indicate that the  
366 ability for LARGE1 to elongate matriglycan requires  $\alpha$ -DGN to be attached to DG. This finding  
367 is consistent with data showing that matriglycan is not elongated when  $\alpha$ -DGN is deleted, even  
368 when LARGE1 is overexpressed. Therefore,  $\alpha$ -DGN acts as a recognition site for the  
369 glycosyltransferase *LARGE1* and establishes a model where  $\alpha$ -DGN, together with  
370 phosphorylated core M3, anchors *LARGE1* to the matriglycan production site to enable its  
371 synthesis and elongation. Notably, although the molecular recognition of  $\alpha$ -DGN by *LARGE1* is  
372 considered essential for the expression of functional DG (*Kanagawa et al., 2004*), our results  
373 show that *LARGE1* can synthesize a short non-elongated form of matriglycan in the absence of  
374  $\alpha$ -DGN, indicating that LARGE1 is capable of adding matriglycan to  $\alpha$ -DG independent of its  
375 interaction with  $\alpha$ -DGN.

376         To determine how much matriglycan is needed to prevent lengthening contraction-  
377 induced reduction in force, we used mice that express different sizes of matriglycan. Muscle  
378 from M- $\alpha$ -DGN KO mice showed an increased force deficit and a 7.6-fold increase in centrally  
379 nucleated fibers compared to muscle from C57 mice, indicating that short forms of matriglycan  
380 do not prevent dystrophic changes. However, despite the lower amount of matriglycan in muscle  
381 from *Dagl<sup>T190M</sup>* mice compared to that from C57 mice, the force deficit was not different  
382 between the two groups, and centrally nucleated fibers were increased in  $\alpha$ -DGN mutant

383 (T190M) mice by only 1.4-fold. This indicates that short matriglycan, if over 150kDa, can  
384 prevent muscular dystrophy.

385 Muscular dystrophy is not observed in a mouse model of Fukuyama congenital muscular  
386 dystrophy, which occurs due to a retrotransposition insertion in the mouse *fukutin* ortholog and  
387 causes laminin-binding at 50% of normal levels (*Kanagawa et al., 2009*). In *Dagl*<sup>T190M</sup> mice, the  
388 laminin-binding level is about 45% of normal, which likely explains a mild increase in centrally  
389 nucleated fibers compared to C57 muscle. However, in muscle from M- $\alpha$ -DGN KO mice, the  
390 laminin-binding level is only 9% relative to that of C57 mice and leads to a marked increase in  
391 centrally nucleated fibers and force deficit induced by lengthening contractions. This indicates  
392 that matriglycan length is critical for regulating damage induced by lengthening contractions and  
393 that the production of ~120-150 kDa  $\alpha$ -DG significantly prevents dystrophic change, suggesting  
394 that this pathologic effect can be prevented without the expression of full-length matriglycan.  
395 Thus, our results describe a relationship between matriglycan size, damage induced by  
396 lengthening contractions, and the degree of dystrophic change. However, the difference between  
397 the abundance of central nuclei and the results of damage due to lengthening contractions in C57  
398 and *Dagl* mice indicate that other factors likely contribute to normal physiologic function in  
399 muscle.

400 Collectively our study demonstrates that  $\alpha$ -DG with  $\alpha$ -DGN is required for the synthesis  
401 of full-length matriglycan on  $\alpha$ -DG (~150-250 kDa). In the absence of  $\alpha$ -DGN, LARGE1 can  
402 synthesize a short non-elongated form of matriglycan on  $\alpha$ -DG (~100-125kDa) in skeletal  
403 muscle in a process that is independent of its interaction with  $\alpha$ -DGN. These findings are  
404 essential for a complete understanding of the mechanisms underlying matriglycan synthesis and

405 show that matriglycan length regulates the severity of muscular dystrophy and may serve as a  
406 therapeutic target for the treatment of  $\alpha$ -dystroglycanopathy.

407 **Materials and methods**

408 **Animals**

409 All mice were maintained in a barrier-free, specific pathogen-free grade facility and had access  
410 to normal chow and water *ad libitum*. All animals were manipulated in biosafety cabinets and  
411 change stations using aseptic procedures. The mice were maintained in a climate-controlled  
412 environment at 25°C on a 12/12 hour light/dark cycle. Animal care, ethical usage, and  
413 procedures were approved and performed in accordance with the standards set forth by the  
414 National Institutes of Health and the University of Iowa Animal Care and Use Committee  
415 (IACUC). Mouse lines used in the study that have been previously described are: *Dag1*<sup>-/-</sup> (JAX#  
416 006836; *Williamson et al., 1997*), *Dag1*<sup>flox</sup> (JAX# 009652; *Cohn et al., 2002*), *Dag1*<sup>Aa-DGN</sup> (*de*  
417 *Greef et al., 2019*), *Dag1*<sup>T190M</sup> (*Hara et al., 2011*), *Large1*<sup>myd</sup> (JAX# 000300) (*Lane et al., 1976*),  
418 *Mck*<sup>cre</sup> (JAX# 006475) (*Brüning et al., 1998*), *Pax7*<sup>cre</sup> (JAX# 010530) (*Keller et al., 2004*), and  
419 *Mck*<sup>cre</sup> *Pax7*<sup>cre</sup> *POMK*<sup>flox</sup> (*Walimbe et al., 2020*).

420 **Muscle-specific DG knockout mice (*Pax7*<sup>cre</sup> *Dag1*<sup>flox/flox</sup>)**

421 Male mice expressing the *Pax7-Cre* transgene were bred to female mice that were homozygous  
422 for the floxed *Dag1* allele (*Dag1*<sup>flox/flox</sup>). Male F1 progeny with the genotype *Pax7*<sup>Cre</sup>; *Dag1*<sup>flox/+</sup>  
423 were bred to female *Dag1*<sup>flox/flox</sup> mice. A *Cre* PCR genotyping protocol was used to genotype the  
424 *Cre* allele using standard *Cre* primers. The primers used were Sense:  
425 TGATGAGGTTTCGCAAGAACC and Antisense: CCATGAGTGAACGAACCTGG.  
426 Genotyping of *Pax7*<sup>Cre</sup>; *Dag1*<sup>flox/flox</sup> mice was performed by Transnetyx using real-time PCR.



427 **Muscle-specific  $\alpha$ -DGN knockout mice (M- $\alpha$ -DGN KO)**

428 Male mice expressing the *Pax7-Cre* transgene were bred to female mice that were heterozygous  
429 for the *Dag1* <sup>$\Delta$   $\alpha$ -DGN</sup> allele (*Dag1*<sup>wt/ $\Delta\alpha$ -DGN</sup>). Male F1 progeny with the genotype *Pax7*<sup>Cre</sup>;  
430 *Dag1*<sup>wt/ $\Delta\alpha$ -DGN</sup> were bred to female mice homozygous for the floxed *Dag1* allele (*Dag1*<sup>flox/flox</sup>).  
431 Genotyping of *Pax7*<sup>Cre</sup>*Dag1*<sup>flox/ $\Delta\alpha$ -DGN</sup> mice was performed by Transnetyx using real-time PCR.  
432 For studies with M- $\alpha$ -DGN KO mice, three mice of each genotype (control and  
433 *Pax7*<sup>Cre</sup>*Dag1*<sup>flox/ $\Delta\alpha$ -DGN</sup>) were used.  
434 Littermate controls were employed whenever possible. The number of animals required was  
435 based on previous studies (*de Greef et al., 2016; Goddeeris et al., 2013, Walimbe et al., 2020*)  
436 and experience with standard deviations of the given techniques.

437 **Forelimb grip strength test**

438 Forelimb grip strength was measured at three months using previously published methods (*de*  
439 *Greef et al., 2016, Walimbe, et al., 2020*). A mouse grip strength meter (Columbus Instruments,  
440 Columbus, OH) was mounted horizontally, with a non-flexible grid connected to the force  
441 transducer. The mouse was allowed to grasp the grid with its two front paws and then pulled  
442 away from the grid by its tail until the grip was broken. This was done three times over five  
443 trials, with a one-minute break between each trial. The gram force was recorded per pull, and any  
444 pull where only one front limb or any hind limbs were used was discarded. If the mouse turned,  
445 the pull was also discarded. After 15 pulls (five sets of three pulls), the mean of the three highest  
446 pulls of the 15 was calculated and reported. Statistics were calculated using GraphPad Prism 8  
447 software. Student's t-test was used (two-sided). Differences were considered significant at a p-  
448 value less than 0.05. Graph images were also created using GraphPad Prism and the data in the  
449 present study are shown as the means + / - SD unless otherwise indicated.

450 **Body weight measurements**

451 Mice were weighed as previously described (*de Greef et al., 2016, Walimbe et al., 2020*).  
452 Weights were measured after testing grip strength using a Scout SPX222 scale (OHAUS  
453 Corporation, Parsippany, NJ), and the tester was blinded to genotype. Statistics were calculated  
454 using GraphPad Prism 8 software and Student's t-test was used (two-sided). Differences were  
455 considered significant at a p-value less than 0.05. Graph images were also created using  
456 GraphPad Prism and the data in the present study are shown as the means + / - SD unless  
457 otherwise indicated.

458 **Measurement of *in vitro* muscle function**

459 To compare the contractile properties of muscles, EDL muscles were surgically removed as  
460 described previously (*Rader et al., 2016; de Greef et al., 2016, Walimbe et al., 2020*). The  
461 muscle was immediately placed in a bath containing a buffered physiological salt solution  
462 (composition in mM: NaCl, 137; KCl, 5; CaCl<sub>2</sub>, 2; MgSO<sub>4</sub>, 1; NaH<sub>2</sub>PO<sub>4</sub>, 1; NaHCO<sub>3</sub>, 24;  
463 glucose, 11). The bath was maintained at 25°C, and the solution was bubbled with 95% O<sub>2</sub> and  
464 5% CO<sub>2</sub> to stabilize pH at 7.4. The proximal tendon was clamped to a post and the distal tendon  
465 was tied to a dual mode servomotor (Model 305C; Aurora Scientific, Aurora, ON, Canada).  
466 Optimal current and whole muscle length (L<sub>0</sub>) were determined by monitoring isometric twitch  
467 force. Optimal frequency and maximal isometric tetanic force (F<sub>0</sub>) were also determined. The  
468 muscle was then subjected to an EC protocol consisting of eight ECs at three-minute intervals. A  
469 fiber length L<sub>f-to-L<sub>0</sub></sub> ratio of 0.45 was used to calculate L<sub>f</sub>. Each EC consisted of an initial 100  
470 millisecond isometric contraction at optimal frequency immediately followed by a stretch of L<sub>0</sub>  
471 to 30% of L<sub>f</sub> beyond L<sub>0</sub> at a velocity of 1 L<sub>f</sub>/s at optimal frequency. The muscle was then  
472 passively returned to L<sub>0</sub> at the same velocity. At 3, 15, 30, 45, and 60 minutes after the EC

473 protocol, isometric tetanic force was measured. After the analysis of the contractile properties,  
474 the muscle was weighed. The CSA of muscle was determined by dividing the muscle mass by  
475 the product of  $L_f$  and the density of mammalian skeletal muscle (1.06 g/cm<sup>3</sup>). The specific force  
476 was determined by dividing  $F_o$  by the CSA (kN/mm<sup>2</sup>). 18–20-week-old male mice were used,  
477 and right and left EDL muscles from each mouse were employed whenever possible, with five to  
478 eight muscles used for each analysis. Each data point represents an individual EDL. Statistics  
479 were calculated using GraphPad Prism 8 software and Student's unpaired t-test was used (two-  
480 sided). Differences were considered significant at a p-value less than 0.05.

#### 481 **H&E and immunofluorescence analysis of skeletal muscle**

482 Histology and immunofluorescence of mouse skeletal muscle were performed as described  
483 previously (*Goddeeris et al., 2013*). Mice were euthanized by cervical dislocation and directly  
484 after sacrifice, quadriceps muscles were isolated, embedded in OCT compound and then snap  
485 frozen in liquid nitrogen-cooled 2-methylbutane. 10  $\mu$ M sections were cut with a cryostat (Leica  
486 CM3050S Research Cryostat; Amsterdam, the Netherlands) and H&E stained using conventional  
487 methods. Whole digital images of H&E-stained sections were taken by a VS120-S5-FL Olympus  
488 slide scanner microscope (Olympus Corporation, Tokyo, Japan). For immunofluorescence  
489 analyses, a mouse monoclonal antibody to matriglycan on  $\alpha$ -DG (IIH6, 1:100 dilution,  
490 Developmental Studies Hybridoma Bank, University of Iowa; RRID:AB\_2617216) was added to  
491 sections overnight at 4 °C followed by Alexa Fluor-conjugated goat IgG against mouse IgM  
492 (Invitrogen, Carlsbad, CA, 1:500 dilution) for 40 minutes. The sections were also stained with  
493 rabbit polyclonal antibody to  $\beta$ -DG (AP83; 1:50 dilution) followed by Alexa Fluor-conjugated  
494 488 Goat anti-rabbit IgG (1:500). Whole sections were imaged with a VS120-S5-FL Olympus  
495 slide scanner microscope. Antibody IIH6 is a mouse monoclonal to matriglycan on  $\alpha$ -DG

496 (*Ervasti and Campbell, 1991*), and AP83 is a rabbit polyclonal antibody to the C-terminus of  $\beta$ -  
497 DG (*Ervasti and Campbell, 1991*), both of which have been described previously.

498 For histologic analysis of skeletal muscle, H&E staining on 10  $\mu$ M frozen section was  
499 performed using the Leica ST5020 Multistainer workstation (Leica Biosystems, Buffalo Grove,  
500 IL) according to the manufacturer's instructions. For immunofluorescence analysis, unfixed  
501 frozen serial sections (7  $\mu$ M) were incubated with primary antibodies for one hour, and then with  
502 the appropriate biotinylated secondary antibodies for 30 minutes followed by streptavidin  
503 conjugated to Alexa Fluor 594 (ThermoFisher Scientific, UK) for 15 minutes. Primary antibodies  
504 used were mouse monoclonal:  $\alpha$ -DG I1H6 (clone I1H6C4) (*Ervasti and Campbell, 1991*),  $\beta$ -DG  
505 (Leica, Milton Keynes, UK; clone 43DAG1/8D5). All washes were made in PBS and  
506 incubations were performed at room temperature. Sections were evaluated with a Leica DMR  
507 microscope interfaced to MetaMorph (Molecular Devices, Sunnyvale, CA).

#### 508 **Neuromuscular Junction (NMJ) Morphology**

509 Immediately upon harvest, EDL muscles were washed in PBS three times for five minutes each.  
510 EDL muscles were fixed in 4% paraformaldehyde for 20 minutes followed by three washes in  
511 PBS. Fixed muscle samples were split into three to four fiber bundles before incubating in 3%  
512 Triton-X 100/PBS for three hours at 4 °C. Muscles were subsequently washed in PBS followed  
513 by blocking at 4 °C for four hours in Background Buster (Innovex; NB306). Samples incubated  
514 with primary antibodies against neurofilament H (NF-H; EnCor; CPCA-NF-H) at 1:1,000 and  
515 synaptophysin (Thermo Fisher Scientific; MA5-14532) at 1:100 diluted in 5% Background  
516 Buster/1% Triton-X 100/PBS at 4 °C overnight. The muscles were then washed with PBS and  
517 incubated with fluorescently conjugated secondary antibodies and Alexa Fluor 488-conjugated  
518  $\alpha$ -bungarotoxin (Invitrogen; B13422) diluted in 5% Background Buster/PBS for two hours.

519 Images were acquired using an Olympus FLUOVIEW FV3000 confocal laser scanning  
520 microscope. Complete *enface* NMJs were identified and acquired with Z-stacks using 60x and  
521 100x objectives. Maximum intensity Z-stacks were reconstructed with the FV31S (Olympus)  
522 software and deconvoluted with cellSens Dimension (Olympus). Blinded observers analyzed  $\alpha$ -  
523 BTX-488-labeled AChR cluster formations to determine irregularities, fragmentation, synaptic  
524 size, and dispersion. Irregularities included AChR plaques, AChR perforated plaques, ring-  
525 shaped or c-shaped clusters, and extensive fragmentation. Fragmentation was determined by the  
526 number of identifiable individual AChR clusters within the footprint of the synapse. FUJI ImageJ  
527 software was used for semi-automatic analysis of AChR clusters. Synaptic size refers to the total  
528 perimeter or footprint of the postsynapse. AChR cluster dispersion was determined by the (total  
529 stained area/total area) \*100.

### 530 **Tissue biochemical analysis**

531 Mouse skeletal muscle was minced into small pieces and homogenized with polytron  
532 (Kinematica, PT10-35) three times for 10 seconds at power 4 to 5 in 15 ml of TBS (150 mM  
533 NaCl) with 1% TX100 and 10 mM EDTA, and protease inhibitors (per 10 mL buffer: 67 mL  
534 each of 0.2 M phenylmethylsulfonylfluoride (PMSF), 0.1 M benzamidine, and 5  $\mu$ L of each of  
535 leupeptin (Sigma/Millipore) 5 mg/mL, pepstatin A (Millipore) 1 mg/mL in methanol, and  
536 aprotinin (Sigma-Aldrich) 5 mg/mL. The samples were incubated in a cold room 1 hr. with  
537 rotation. The samples were centrifuged in a Beckman Coulter Avanti J-E centrifuge for 30  
538 minutes at 20,000xg, 4 °C. The supernatant was combined with WGA slurry at 600  $\mu$ L per gram  
539 of starting muscle and rotated at 4C over night.

540 The WGA beads were washed using 10X volume of WGA beads/wash 3X for three minutes at  
541 1000 x g with 0.1%Tx/TBS, plus protease inhibitors. After the final wash, the WGA beads

542 (Vector Laboratories, AL-1023) were eluted with Laemmli Sample Buffer (LSB) at 600  $\mu$ L per  
543 gram of starting material at 99 °C for 10 minutes. The final concentration was 1.11 mg skm/ $\mu$ L  
544 beads and LSB. Samples were loaded (beads and LSB) in a 3-15% gradient gel. The proteins  
545 were transferred to PVDF-FL membranes (Millipore) as previously published (*Michele et al.,*  
546 *2002; Goddeeris et al., 2013*). EDTA (10 mM) was used in the homogenization to more  
547 efficiently extract  $\alpha$ -DG containing matriglycan in the muscle homogenates. (*Figure 7-figure*  
548 *supplement 1 WT and POMK*), while EDTA had no effect on *myd*  $\alpha$ -DG (matriglycan-negative)  
549 extraction (*Figure 7-figure supplement 1 myd*).

#### 550 **Immunoblotting and ligand overlay**

551 The mouse monoclonal antibody against matriglycan on  $\alpha$ -DG (IIH6, Developmental Studies  
552 Hybridoma Bank, University of Iowa; RRID:AB\_2617216) was characterized previously and  
553 used at 1:100 (*Ervasti and Campbell, 1991*). The polyclonal antibody, AF6868 (R&D Systems,  
554 Minneapolis, MN; RRID:AB\_10891298), was used at a concentration of 1:100 for  
555 immunoblotting the core  $\alpha$ -DG and  $\beta$ -DG proteins, and the secondary was a donkey anti-sheep  
556 (LI-COR Bioscience, Lincoln, NE) used at 1:10,000 concentration. The mouse xxxx antibody  
557 against matriglycan on  $\alpha$ -DG (III HII) was previously used (*Groh et al., 2009*). Blots were  
558 developed with infrared (IR) dye-conjugated secondary antibodies (*Walimbe et al., 2020*) and  
559 scanned using the Odyssey infrared imaging system (LI-COR Bioscience). Blot images were  
560 captured using the included Odyssey image-analysis software.

561 Laminin overlay assays were performed as previously described (*Michele et al., 2002;*  
562 *Goddeeris et al., 2013*). Immobilon-FL membranes were blocked in laminin-binding buffer  
563 (LBB: 10 mM triethanolamine, 140 mM NaCl, 1 mM MgCl<sub>2</sub>, 1 mM CaCl<sub>2</sub>, pH 7.6) containing  
564 5% milk followed by incubation with mouse Engelbreth-Holm-Swarm (EHS) laminin

565 (ThermoFisher, 23017015) overnight at a concentration of 7.5 nM at 4 °C in LBB containing 3%  
566 bovine serum albumin (BSA) and 2 mM CaCl<sub>2</sub>. Membranes were washed and incubated with  
567 anti-laminin antibody (L9393; Sigma-Aldrich 1:1000 dilution) followed by IRDye 800 CW dye-  
568 conjugated donkey anti-rabbit IgG (LI-COR, 926–32213) at 1:10,000.

#### 569 **Digestion of $\alpha$ -DG with exoglycosidases**

570  $\beta$ -glucuronidase from *Thermotoga maritima* and  $\alpha$ -xylosidase from *Sulfolobus solfataricus* were  
571 cloned into pET-28a (+) vector between NheI/XhoI sites in frame with the N-terminal 6xHis tag.  
572 The plasmids (20ng each) were chemically transformed into 50 $\mu$ l BL21DE3 One shot competent  
573 cells. One colony each was picked and inoculated in 20ml LB (with kanamycin 50  $\mu$ g/ml)  
574 overnight at 37 °C. The next day, 10 ml of the overnight culture was inoculated into 1-liter LB  
575 (with kanamycin 50 $\mu$ g/ml). After reaching 0.6 OD at 600 nm the cultures were induced with 1  
576 mM IPTG and incubated at 16 °C overnight. The next day the cells were centrifuged at 5000g,  
577 for 10 minutes at 4 °C. Cell pellets were stored at -80 °C until ready for purification.

578 The pellets were dissolved in 20 ml homogenization buffer (50 mM Tris-Cl, 150 mM  
579 NaCl, 1% TX-100, and all protease inhibitors) per liter culture. The cells were stored again  
580 overnight in 50 ml falcon tubes at -80 °C for ice crystal formation. Cells were thawed the next  
581 day for purification. Nuclease (Pierce) was added at 1.25kU and cells were sonicated at power  
582 level four-five for four times with 10s intervals in between at 4 °C. Cells were then centrifuged at  
583 15000g for 20 minutes at 4 °C. The supernatant was heat fractionated at 75 °C for 10 minutes  
584 after which it was centrifuged at 15000g for 30 minutes at 4 °C. Meanwhile, a TALON  
585 superflow metal affinity column was prepared by packing 3 ml of resin and equilibrating with  
586 wash buffer 1 (50 mM Tris-Cl, 100 mM NaCl, 0.1% TX-100, all PIs). All further purification  
587 steps were performed at 4 °C. The extract was applied to the column three times, such that each

588 time, the extract was incubated with the column for 15-30 minutes on gentle rocking platform.  
589 All flowthrough was saved. The column was washed three times with wash buffer 1. All washes  
590 were saved. The column was next washed with high salt wash buffer (50 mM Tris-Cl, 500 mM  
591 NaCl, 0.1% TX-100, all PIs) to remove nonspecific interactions and the high salt wash was  
592 saved. Proteins were then eluted with elution buffer (50 mM Tris-Cl, 100 mM NaCl, 0.1% TX-  
593 100 and 300 mM Imidazole) in five fractions of three milliliters each. The relevant fractions  
594 (elute 1 and 2) were pooled together, and buffer exchanged with 1XPBS pH 7.4 with 30 kDa  
595 concentrators (Amicon). 100  $\mu$ l was loaded on SDS PAGE from all fractions and washes to  
596 visualize with Coomassie.

597 WGA enriched glycoproteins (elutes) were buffer exchanged with Sodium acetate buffer  
598 pH 5.5 using 30 kDa concentrators and heated for five minutes in the presence of 10 mM  $\beta$ -  
599 mercaptoethanol at 99 °C. All protease inhibitors were added after the mixture cooled down. 50  
600  $\mu$ l of each enzyme was added per 500  $\mu$ l of WGA-enriched and buffer-exchanged glycoproteins.  
601 The initial time point was aliquoted as T<sub>0</sub> and the rest was incubated at 75 °C with 600 rpm  
602 shaking for 16 hours.

### 603 **AAV vector production and AAV injection**

604 The sequence encoding mouse *like-acetylglucosaminyltransferase-1* (*Large1*) was synthesized  
605 (Genscript, Piscataway, NJ) and cloned into the AAV backbone under the transcriptional control  
606 of the ubiquitous CMV promoter. The AAV2/9 vector contains the genome of serotype 2  
607 packaged in the capsid from serotype 9 and was selected due to its ability to improve muscle  
608 transduction efficiency as well as alter tropism. The vector AAV2/9-CMV-*Large1* was generated  
609 by the University of Iowa Viral Vector Core Facility. For adult mice, 100  $\mu$ L ( $4.35 \times 10^{12}$  vg) of  
610 the vector solution was administered once intraperitoneally or intravenously via the retro-orbital



611 (RO) sinus. The sequence encoding mouse *like-acetylglucosaminyltransferase-1 (Large1)* was  
612 synthesized (Genscript, Piscataway, NJ) and cloned into the AAV backbone under the  
613 transcriptional control of the muscle-specific MCK promoter (gift from Jeff Chamberlain). The  
614 vector AAV2/9-MCK-*Large1* was generated by the University of Iowa Viral Vector Core  
615 Facility. For adult mice, 100  $\mu$ L ( $2.55 \times 10^{12}$  vg) of the vector solution were administered once  
616 intraperitoneally or intravenously via the retro-orbital (RO) sinus. The sequence encoding mouse  
617  *$\alpha$ -DG lacking the N-terminal domain (H30 – A316)* was synthesized (Genscript) and cloned into  
618 the AAV backbone under the transcriptional control of the muscle-specific MCK promoter. The  
619 vector AAV2/9-MCK-*DG-E* was generated by the University of Iowa Viral Vector Core  
620 Facility. For adult mice, 100  $\mu$ L ( $6.17 \times 10^{11}$  vg) of the vector solution was administered once  
621 intraperitoneally or intravenously via the retro-orbital (RO) sinus. The sequence encoding mouse  
622 *alpha-DG N terminal domain( $\alpha$ -DGN)* was synthesized (Genscript) and cloned into the AAV  
623 backbone under the transcriptional control of the ubiquitous CMV promoter. The AAV2/9 vector  
624 contains the genome of serotype 2 packaged in the capsid from serotype 9 and was selected due  
625 to its ability to improve muscle transduction efficiency as well as alter tropism. The vector  
626 AAV2/9CMV $\alpha$ -DGN was generated by the University of Iowa Viral Vector Core Facility. For  
627 adult mice, 100  $\mu$ L ( $1.7 \times 10^{12}$  vg) of the vector solution was administered once intraperitoneally  
628 or intravenously via the retro-orbital (RO) sinus.

### 629 **Solid-phase assay**

630 Solid-phase assays were performed as described previously (*Michele et al., 2002; Goddeeris et*  
631 *al., 2013*). Briefly, WGA N-acetyl-glycosamine buffer eluates were diluted 1:50 in TBS and  
632 coated on polystyrene ELISA microplates (Costar 3590) overnight at 4 °C. Plates were washed  
633 in LBB and blocked for two hours in 3% BSA/LBB at room temperature. The wells were washed

634 with 1% BSA/LBB and incubated for one hour with L9393 (1:5000 dilution) in 3% BSA/LBB  
635 followed by incubation with Horseradish Peroxidase (HRP)-conjugated anti-rabbit IgG  
636 (Invitrogen, 1:5000 dilution) in 3% BSA/LBB for 30 minutes. Plates were developed with o-  
637 phenylenediamine dihydrochloride and H<sub>2</sub>O<sub>2</sub>, and reactions were stopped with 2 N H<sub>2</sub>SO<sub>4</sub>.  
638 Absorbance per well was read at 490 nm by a microplate reader.

### 639 **Statistics**

640 The included Shimadzu post-run software was used to analyze LARGE1 activity in mouse  
641 skeletal muscle, and the percent conversion to the product was recorded. The means of three  
642 experimental replicates (biological replicates, where each replicate represents a different pair of  
643 tissue culture plates or animals, i.e. control and knockout) were calculated using Microsoft  
644 Excel, and the mean percent conversion to product for the WT or control sample (control mouse  
645 skeletal muscle or *M-α-DGN KO* mouse skeletal muscle and myd mouse skeletal muscle,  
646 respectively) reaction was set to one. The percent conversion of each experimental reaction was  
647 subsequently normalized to that of the control, and statistics on normalized values were  
648 performed using GraphPad Prism 8. For analysis of LARGE1 activity in mouse skeletal muscle,  
649 Student's t-test was used (two-sided). Differences were considered significant at a p-value less  
650 than 0.05. Graph images were also created using GraphPad Prism and the data in the present  
651 study are shown as the means + / - SD unless otherwise indicated. The number of sampled units,  
652 n, upon which we report statistics for *in vivo* data, is the single mouse (one mouse is n = 1).

### 653 **Data Availability**

654 All data generated or analyzed during this study are included in this published article.

655 **Acknowledgements**

656 We thank Keith Garringer for technical assistance and the University of Iowa Viral Vector Core  
657 for generating the adeno-associated viral vector (<http://www.medicine.uiowa.edu/vectorcore>).  
658 The MCK promoter was a gift from Jeff Chamberlain (University of Washington, Seattle, WA).  
659 We are grateful to Dr. Jennifer Barr of the Scientific Editing and Research Communication Core  
660 at the University of Iowa Carver College of Medicine for her critical reading of the manuscript.  
661 We are also grateful to Amber Mower for her assistance with administrative support and Rachel  
662 Poe for her support in figure design.

663 **Ethics**

664 Animal experimentation: This study was performed in strict accordance with the  
665 recommendations in the Guide for the Care and Use of Laboratory Animals of the National  
666 Institutes of Health. All animal experiments were approved by the Institutional Animal Care and  
667 Use Committee (IACUC) protocols of the University of Iowa (#0081122).

668 **Competing Interests**

669 The authors declare no competing financial interests. Correspondence and requests for materials  
670 should be addressed to K.P.C. ([kevin-campbell@uiowa.edu](mailto:kevin-campbell@uiowa.edu)).

671 **Funding**

672 This work was supported in part by a Paul D. Wellstone Muscular Dystrophy Specialized  
673 Research Center grant (1U54NS053672 to KPC). KPC is an investigator of the Howard Hughes  
674 Medical Institute. This work was also supported by the Cardiovascular Institutional Research  
675 Fellowship (5T32HL007121-45 to JMH). A.S.W. is a student in the University of Iowa Medical  
676 Scientist Training Program, which is funded by Medical Scientists Training Program Grant by  
677 the National Institute of General Medical Sciences (NIGMS) 5 T32 GM007337.

678 **Author contributions**

679 Conceptualization: H.O., K.P.C.

680 Methodology: H.O., J.M.H, M.E.A., D.V., A.S.W., S.J., Y.H., F.S., K.M., K.P.C.

681 Formal analysis: H.O., J.M.H, M.E.A., D.V., A.S.W., S.J., K.P.C.

682 Investigation: H.O., J.M.H, M.E.A., D.V., A.S.W., S.J., Y.H., F.S., K.M., K.P.C.

683 Writing – original draft preparation: H.O., K.P.C.

684 Writing – review & editing: H.O., J.M.H, M.E.A., D.V., A.S.W., S.J., K.P.C.

685 Supervision: K.P.C.

686 Project administration: K.P.C.

687 Funding acquisition: K.P.C.

688 **Author ORCIDs**

689 Hidehiko Okuma <https://orcid.org/0000-0002-2749-9855>

690 Jeffrey M Hord <https://orcid.org/0000-0003-1343-5938>

691 Ishita Chandel <https://orcid.org/0000-00003-4821-1918>

692 Mary E Anderson <https://orcid.org/0000-0001-5342-530X>

693 David Venzke <http://orcid.org/0000-0001-8180-9562>

694 Ameya S Walimbe <https://orcid.org/0000-0002-3248-0761>

695 Soumya Joseph <https://orcid.org/0000-0002-0487-1378>

696 Zeita Gastel <https://orcid.org/0000-0003-2302-952X>

697 Yuji Hara <https://orcid.org/0000-0003-0021-1740>

698 Fumiaki Saito <https://orcid.org/0000-0002-5532-6193>

699 Kiichiro Matsumura <https://orcid.org/0000-0002-5237-8430>

700 Kevin P Campbell <https://orcid.org/0000-0003-2066-5889>

701 **References**

- 702 Brancaccio, A., Schulthess, T., Gesemann, M., Engel, J. (1995). Electron microscopic evidence  
703 for a mucin-like region in chick muscle alpha-dystroglycan. *FEBS Lett*, 368(1), 139-142.  
704 DOI: 10.1016/0014-5793(95)00628-m, PMID: 7615068
- 705 Carss, K. J., Stevens, E., Foley, A. R., Cirak, S., Riemersma, M., Torelli, S., Hoischen, A.,  
706 Willer, T., Van Scherpenzeel, M., Moore, S. A., Messina, S., Bertini, E., Bönnemann, C.  
707 G., Abdenur, J. E., Grosman, C. M., Kesari, A., Punetha, J., Quinlivan, R., Waddell, L.  
708 B., Young, H. K., Wraige, E., Yau, S., Brodd, L., Feng, L., Sewry, C., MacArthur, D. G.,  
709 North, K. N., Hoffman, E., Stemple, D. L., Hurles, M. E., van Bokhoven, H., Campbell,  
710 K. P., Lefeber, D. J., UK10K Consortium, Lin, Y. Y., Muntoni, F. (2013). Mutations in  
711 GDP-mannose pyrophosphorylase B cause congenital and limb-girdle muscular  
712 dystrophies associated with hypoglycosylation of alpha-dystroglycan. *Am J Hum Genet*,  
713 93(1), 29-41. DOI: 10.1016/j.ajhg.2013.05.009, PMID: 23768512
- 714 Chiba, A., Matsumura, K., Yamada, H., Inazu, T., Shimizu, T., Kusunoki, S., Kanazawa, I.,  
715 Kobata, A., Endo, T. (1997). Structures of sialylated O-linked oligosaccharides of bovine  
716 peripheral nerve alpha-dystroglycan. The role of a novel O-mannosyl-type  
717 oligosaccharide in the binding of alpha-dystroglycan with laminin. *J Biol Chem*, 272(4),  
718 2156-2162. DOI: 10.1074/jbc.272.4.2156, PMID: 8999917
- 719 Cirak, S., Foley, A. R., Herrmann, R., Willer, T., Yau, S., Stevens, E., Torelli, S., Brodd, L.,  
720 Kamynina, A., Vondracek, P., Roper, H., Longman, C., Korinthenberg, R., Marrosu, G.,  
721 Nürnberg, P., UK10K Consortium, Michele, D. E., Plagnol, V., Hurles, M., Moore, S. A.,  
722 Sewry, C. A., Campbell, K. P., Voit, T., Muntoni, F. (2013). ISPD gene mutations are a

723 common cause of congenital and limb-girdle muscular dystrophies. *Brain*, 136(Pt 1),  
724 269-281. DOI: 10.1093/brain/aws312, PMID: 23288328

725 Cohn, R. D., Henry, M. D., Michele, D. E., Barresi, R., Saito, F., Moore, S. A., Flanagan, J. D.,  
726 Skwarchuk, M. W., Robbins, M. E., Mendell, J. R., Williamson, R. A., Campbell, K. P.  
727 (2002). Disruption of DAG1 in differentiated skeletal muscle reveals a role for  
728 dystroglycan in muscle regeneration. *Cell*, 110(5), 639-648. DOI: 10.1016/s0092-  
729 8674(02)00907-8, PMID: 12230980

730 de Greef, J. C., Hamlyn R., Jensen B. S., Ocampo Landa, R., Levy J. R., Kobuke K., Campbell  
731 K. P. (2016). Collagen VI deficiency reduces muscle pathology, but does not improve  
732 muscle function, in the  $\gamma$ -sarcoglycan-null mouse. *Human Molecular Genetics*. 25(7),  
733 1357-1369. DOI: 10.1093/hmg/ddw018, PMID: 26908621

734 de Greef, J. C., Slutter, B., Anderson, M. E., Hamlyn, R., O'Campo Landa, R., McNutt, E. J.  
735 Hara, Y., Pewe, L. L., Venzke, D., Matsumura, K., Saito, F., Harty, J. T., Campbell, K. P.  
736 (2019). Protective role for the N-terminal domain of alpha-dystroglycan in Influenza A  
737 virus proliferation. *Proc Natl Acad Sci U S A*, 116(23), 11396-11401. DOI:  
738 10.1073/pnas.1904493116, PMID: 31097590

739 Dong, M., Noguchi, S., Endo, Y., Hayashi, Y. K., Yoshida, S., Nonaka, I., Nishino, I. (2015).  
740 DAG1 mutations associated with asymptomatic hyperCKemia and hypoglycosylation of  
741 alpha-dystroglycan. *Neurology*, 84(3), 273-279. DOI: 10.1212/WNL.0000000000001162,  
742 PMID: 25503980

743 Ervasti, J. M., & Campbell, K. P. (1993). A role for the dystrophin-glycoprotein complex as a  
744 transmembrane linker between laminin and actin. *J Cell Biol*, 122(4), 809-823. DOI:  
745 10.1083/jcb.122.4.809, PMID: 8349731

- 746 Goddeeris, M. M., Wu, B., Venzke, D., Yoshida-Moriguchi, T., Saito, F., Matsumura, K.,  
747 Moore, S. A., Campbell, K. P. (2013). LARGE glycans on dystroglycan function as a  
748 tunable matrix scaffold to prevent dystrophy. *Nature*, 503(7474), 136-140. DOI:  
749 10.1038/nature12605, PMID: 24132234
- 750 Groh S, Zong H, Goddeeris MM, Lebakken CS, Venzke D, Pessin JE, Campbell KP.  
751 Sarcoglycan complex: implications for metabolic defects in muscular dystrophies. *J Biol*  
752 *Chem*. 2009 Jul 17;284(29):19178-82. doi: 10.1074/jbc.C109.010728. Epub 2009 Jun 3.  
753 PMID: 19494113; PMCID: PMC2740540.
- 754 Han, R., Kanagawa, M., Yoshida-Moriguchi, T., Rader, E., Ng., R.A., Michele, D.E., Muirhead,  
755 D.E., Kunz, S., Moore, S.A., Iannaccone, S.T., Miyake, K., McNeil, P.L., Mayer, U.,  
756 Oldstone, M.B.A., Faulkner, J.A. and Campbell, K.P. (2009). Basal Lamina Strengthens  
757 Cell Membrane Integrity via the Laminin G Domain Binding of  $\alpha$ -Dystroglycan. *Proc.*  
758 *Natl. Acad. Sci. U.S.A.* 106(31), 12573-12579. DOI: 10.1073/pnas.0906545106, PMID:  
759 19633189
- 760 Hara, Y., Balci-Hayta, B., Yoshida-Moriguchi, T., Kanagawa, M., Beltran-Valero de Bernabe,  
761 D., Gündesli, H., Willer, T., Satz, J. S., Crawford, R. W., Burden, S. J., Kunz, S.,  
762 Oldstone, M. B. A., Accardi, A., Talim, B., Muntoni, F., Topaloğlu, H., Dinçer, P.,  
763 Campbell, K. P. (2011). A dystroglycan mutation associated with limb-girdle muscular  
764 dystrophy. *N Engl J Med*, 364(10), 939-946. DOI: 10.1056/NEJMoa1006939, PMID:  
765 21388311
- 766 Hara, Y., Kanagawa, M., Kunz, S., Yoshida-Moriguchi, T., Satz, J. S., Kobayashi, Y. M., Zhu,  
767 Z., Burden, S. J., Oldstone, M. B. A., Campbell, K. P. (2011). Like-  
768 acetylglucosaminyltransferase (LARGE)-dependent modification of dystroglycan at Thr-

769 317/319 is required for laminin binding and arenavirus infection. *Proc Natl Acad Sci U S*  
770 *A*, 108(42), 17426-17431. DOI: 10.1073/pnas.1114836108, PMID: 21987822

771 Henry, M. D. and Campbell, K. P. (1998) A Role for Dystroglycan in Basement Membrane  
772 Assembly. *Cell*, 95(6), 859-870. DOI: 10.1016/s0092-8674(00)81708-0, PMID: 9865703

773 Hohenester, E. (2019). Laminin G-like domains: dystroglycan-specific lectins. *Curr Opin Struct*  
774 *Biol*, 56, 56-63. DOI: 10.1016/j.sbi.2018.11.007, PMID: 30530204

775 Ibraghimov-Beskrovnya, O., Ervasti, J. M., Leveille, C. J., Slaughter, C. A., Sernett, S. W.,  
776 Campbell, K. P. (1992). Primary structure of dystrophin-associated glycoproteins linking  
777 dystrophin to the extracellular matrix. *Nature*, 355(6362), 696-702. DOI:  
778 10.1038/355696a0, PMID: 1741056

779 Inamori, K., Yoshida-Moriguchi, T., Hara, Y., Anderson, M. E., Yu, L., Campbell, K. P. (2012).  
780 Dystroglycan Function Requires Xylosyl- and Glucuronyltransferase Activities of  
781 LARGE. *Science*, 335(6064), 93-96. DOI: 10.1126/science.1214115, PMID: 22223806

782 Jung, D., Yang, B., Meyer, J., Chamberlain, J. S., Campbell, K. P. (1995). Identification and  
783 characterization of the dystrophin anchoring site on beta-dystroglycan. *J Biol Chem*,  
784 270(45), 27305-27310. DOI: 10.1074/jbc.270.45.27305, PMID: 7592992

785 Kanagawa, M., Nishimoto, A., Chiyonobu, T., Takeda, S., Miyagoe-Suzuki, Y., Wang, F.,  
786 Fujikake, N., Taniguchi, M., Lu, Z., Tachikawa, M., Nagai, Y., Tashiro, F., Miyazaki, J.,  
787 Tajima, Y., Takeda, S., Endo, T., Kobayashi, K., Campbell, K. P., Toda, T. (2009).  
788 Residual laminin-binding activity and enhanced dystroglycan glycosylation by LARGE  
789 in novel model mice to dystroglycanopathy. *Hum Mol Genet*, 18(4), 621-631. DOI:  
790 10.1093/hmg/ddn387, PMID: 19017726



791 Kanagawa, M., Saito, F., Kunz, S., Yoshida-Moriguchi, T., Barresi, R., Kobayashi, Y. M.,  
792 Muschler, J., Dumanski, J. P., Michele, D. E., Oldstone, M. A. B., Campbell, K. P.  
793 (2004). Molecular recognition by LARGE is essential for expression of functional  
794 dystroglycan. *Cell*, *117*(7), 953-964. DOI: 10.1016/j.cell.2004.06.003, PMID: 15210115

795 Lane, P. W., Beamer, T. C., Myers, D. D. (1976). Myodystrophy, a new myopathy on  
796 chromosome 8 of the mouse. *J. Hered.* **67**, 135-138. DOI:  
797 10.1093/oxfordjournals.jhered.a108687, PMID: 939913

798 Michele, D. E., Barresi, R., Kanagawa, M., Saito, F., Cohn, R. D., Satz, J. S., Dollar, J., Nishino,  
799 I., Kelley, R. I., Somer, H., Straub, V., Mathews, K. D., Moore, S. A., Campbell, K. P.  
800 (2002). Post-translational disruption of dystroglycan-ligand interactions in congenital  
801 muscular dystrophies. *Nature*, *418*(6896), 417-422. DOI: 10.1038/nature00837, PMID:  
802 12140558

803 Nishimune, H., Valdez, G., Jarad, G., Moulson, C. L., Müller, U., Miner, J. H., & Sanes, J. R.  
804 (2008). Laminins promote postsynaptic maturation by an autocrine mechanism at the  
805 neuromuscular junction. *Journal of Cell Biology*, *182*(6), 1201–1215. DOI:  
806 10.1083/jcb.200805095

807 Ohtsubo, K., & Marth, J. D. (2006). Glycosylation in cellular mechanisms of health and disease.  
808 *Cell*, *126*(5), 855-867. DOI: 10.1016/j.cell.2006.08.019, PMID: 16959566

809 Puckett, R. L., Moore, S. A., Winder, T. L., Willer, T., Romansky, S. G., Covault, K. K.,  
810 Campbell, K. P., Abdenur, J. E. (2009). Further evidence of Fukutin mutations as a cause  
811 of childhood onset limb-girdle muscular dystrophy without mental retardation.  
812 *Neuromuscul Disord*, *19*(5), 352-356. DOI: 10.1016/j.nmd.2009.03.001, PMID:  
813 19342235

- 814 Rowe., R. G., Weiss, S. J. (2008). Breaching the basement membrane: who, when, and how?  
815 *Trends in Cell Biology*, 18(11), 560-574. DOI: 10.1016/j.tcb.2008.08.007. Epub 2008 Oct  
816 9. PMID: 18848450.
- 817 Saito, F., Moore, S. A., Barresi, R., Henry, M. D., Messing, A., Ross-Barta, S. E., Cohn, R. D.,  
818 Williamson, R. A., Sluka, K. A., Sherman, D. L., Brophy, P. J., Schmelzer, J. D., Low, P.  
819 A., Wrabetz, L., Feltri, M. L., Campbell, K. P. (2003). Unique role of dystroglycan in  
820 peripheral nerve myelination, nodal structure, and sodium channel stabilization. *Neuron*,  
821 38(5), 747-758. DOI: 10.1016/s0896-6273(03)00301-5, PMID: 12797959
- 822 Suzuki, A., Yoshida, M., Hayashi, K., Mizuno, Y., Hagiwara, Y., Ozawa, E. (1994). Molecular  
823 organization at the glycoprotein-complex-binding site of dystrophin. Three dystrophin-  
824 associated proteins bind directly to the carboxy-terminal portion of dystrophin. *Eur J*  
825 *Biochem*, 220(2), 283-292. DOI: 10.1111/j.1432-1033.1994.tb18624.x, PMID: 8125086
- 826 Walimbe, A. S., Okuma, H., Joseph, S., Yang, T., Yonekawa, T., Hord, J. M., Venzke, D.,  
827 Anderson, M. E., Torelli, S., Manzur, A., Devereaux, M., Cuellar, M., Prouty, S.,  
828 Ocampo Landa, S., Yu, L., Xiao, J., Dixon, J. E., Muntoni, F., Campbell, K. P. (2020).  
829 POMK regulates dystroglycan function via LARGE1-mediated elongation of  
830 matriglycan. *Elife*, 9. DOI: 10.7554/eLife.61388, PMID: 32975514
- 831 Williamson, R. A., Henry, M. D., Daniels, K. J., Hrstka, R. F., Lee, J. C., Sunada, Y.,  
832 Ibraghimov-Beskrovnaya, O., Campbell, K. P. (1997). Dystroglycan is essential for early  
833 embryonic development: disruption of Reichert's membrane in Dag1-null mice. *Hum Mol*  
834 *Genet*, 6(6), 831-841. DOI: 10.1093/hmg/6.6.831, PMID: 9175728

- 835 Yoshida-Moriguchi, T., & Campbell, K. P. (2015). Matriglycan: a novel polysaccharide that  
836 links dystroglycan to the basement membrane. *Glycobiology*, 25(7), 702-713. DOI:  
837 10.1093/glycob/cwv021, PMID: 25882296

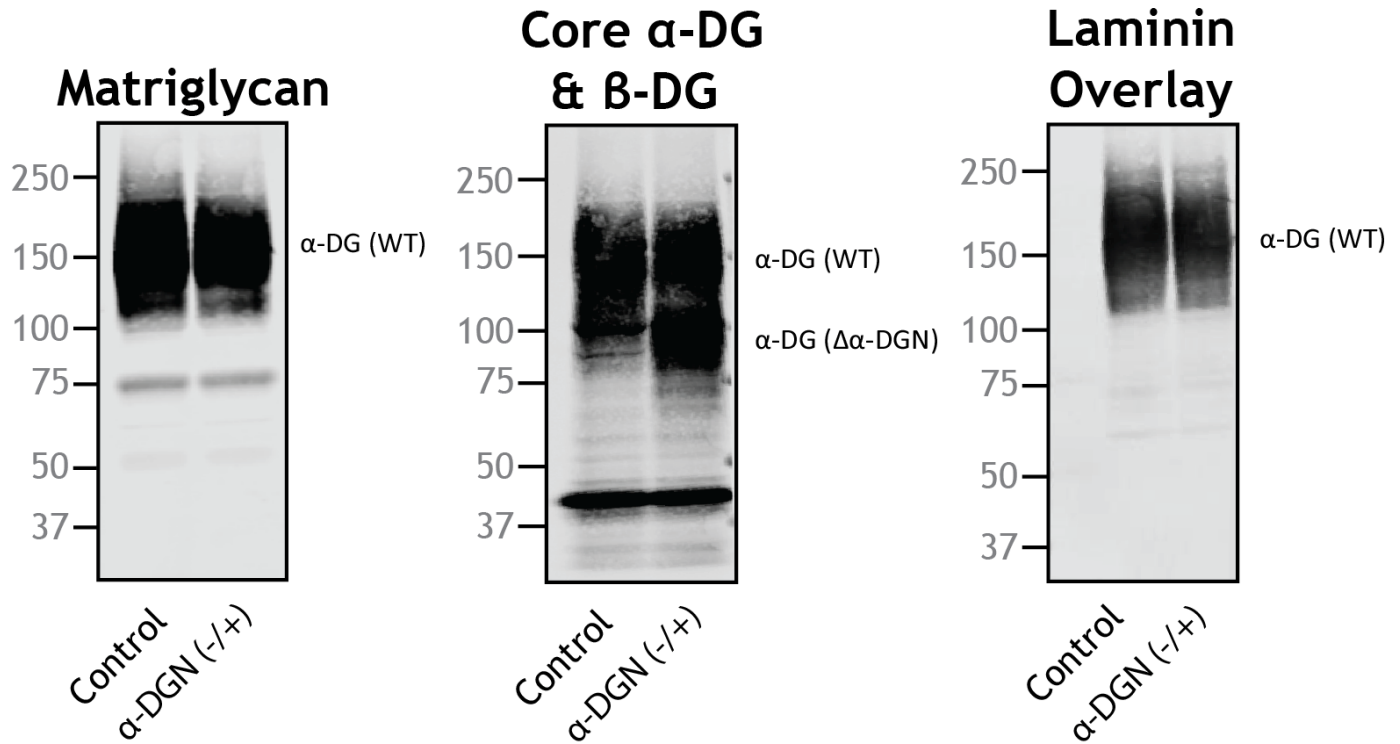

838 **Supplemental Figures**

839

840 **Figure 2-figure supplement 1. Heterozygous mice (+/-) for constitutive deletion of α-DGN**  
841 **have two different sizes of α-DG** Immunoblot analysis of skeletal muscle from littermate  
842 controls or mice that were heterozygous for the α-DGN KO allele (α-DGN (-/+)). Glycoproteins  
843 were enriched from quadriceps skeletal muscles of mice using WGA-agarose with 10 mM  
844 EDTA. Immunoblotting was performed to detect matriglycan (IIIH11), core α-DG and β-DG  
845 (AF6868), and laminin overlay. α-DG in WT control muscle (α-DG(WT)) and α-DG in α-DGN-  
846 deficient muscle (α-DG(Δα-DGN)) are indicated on the right. Molecular weight standards in  
847 kilodaltons (kDa) are shown on the left.

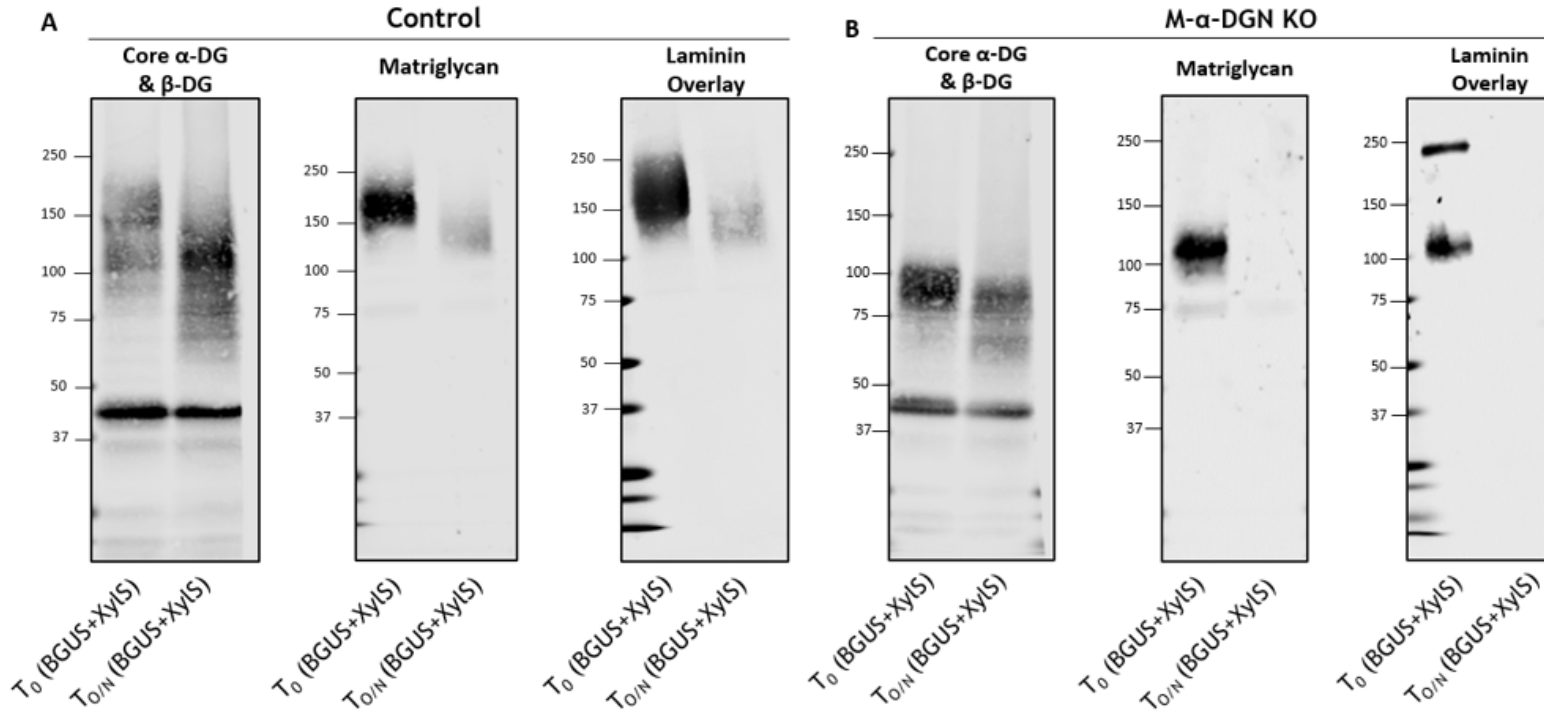

848

849 **Figure 2-figure supplement 2. The short 100-120kDa band in M- $\alpha$ -DGN KO is matriglycan.**

850 (A) Immunoblot analysis of total skeletal muscle from control mice after digestion with enzymes  
851  $\beta$ -glucuronidase and  $\alpha$ -xylosidase. Glycoproteins were enriched using wheat-germ agglutinin  
852 (WGA)-agarose with 10 mM EDTA and incubated overnight with  $\beta$ -glucuronidase (BGUS) and  
853  $\alpha$ -xylosidase (XylS). Immunoblotting was performed to detect matriglycan (IIH6), core  $\alpha$ -DG  
854 and  $\beta$ -DG (AF6868), and laminin overlay before ( $T_0$ ) and after overnight digestion ( $T_{0/N}$ ). (B)  
855 Immunoblot analysis of M- $\alpha$ -DGN KO total skeletal muscle after digestion with enzymes  $\beta$ -  
856 glucuronidase and  $\alpha$ -xylosidase. Glycoproteins were enriched using wheat-germ agglutinin  
857 (WGA)-agarose with 10 mM EDTA and incubated overnight with  $\beta$ -glucuronidase and  $\alpha$ -  
858 xylosidase. Immunoblotting was performed to detect matriglycan (IIH6), core  $\alpha$ -DG and  $\beta$ -DG  
859 (AF6868), and laminin overlay before ( $T_0$ ) and after digestion ( $T_{0/N}$ ). Molecular weight  
860 standards in kilodaltons (kDa) are shown on the left.

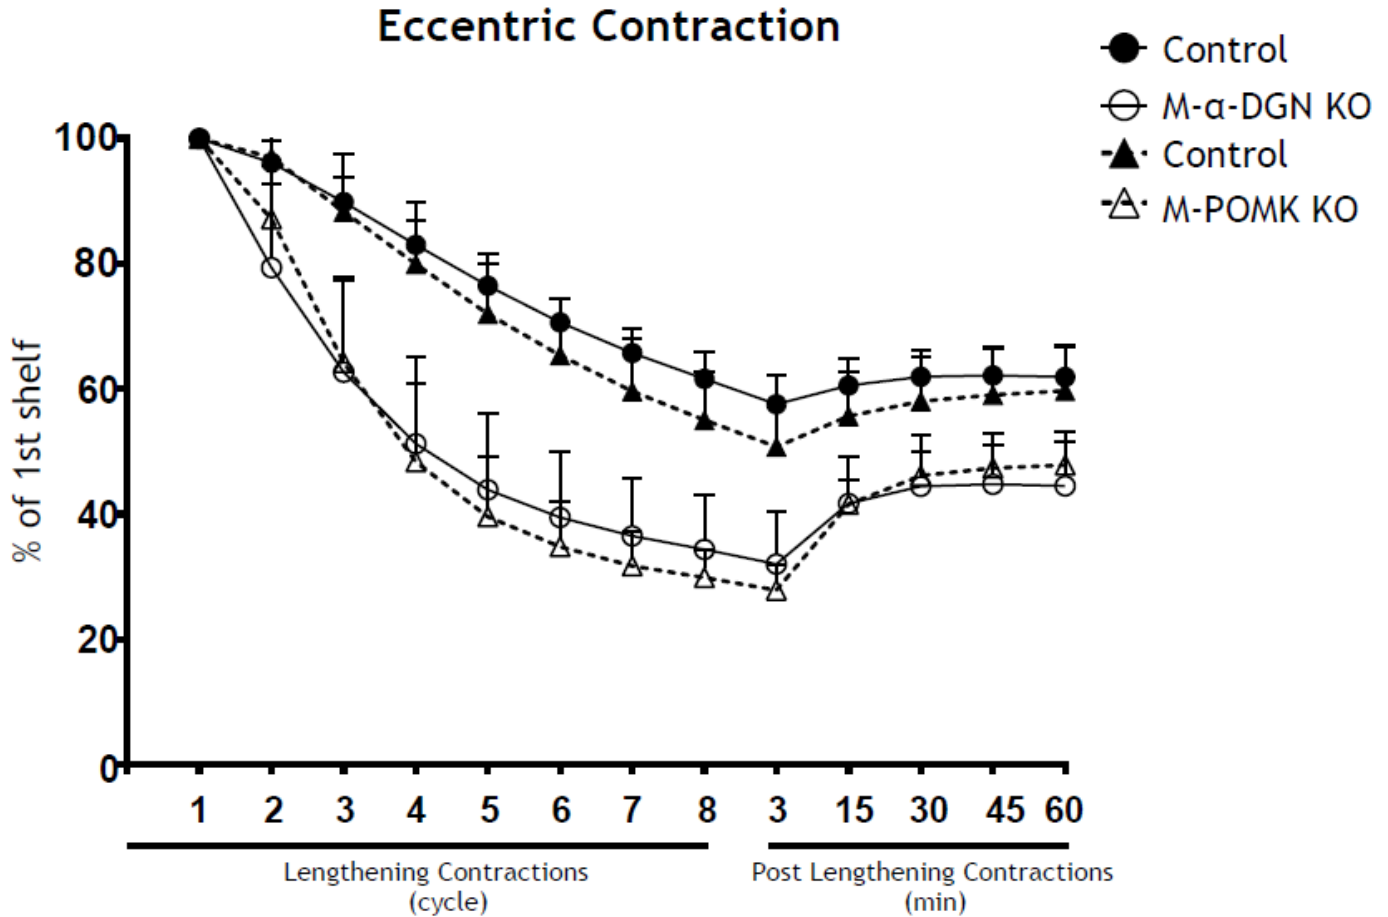

861

862 **Figure 4-figure supplement 1.  $\alpha$ -DGN-deficient muscle and POMK-deficient muscle with**  
863 **similar short forms of matriglycan exhibit similar lengthening contraction-induced force**  
864 **decline.** Force deficit and force recovery after eccentric contractions in EDL muscles from 12- to  
865 17-week-old male & female controls (closed circles; n=7), M- $\alpha$ -DGN KO (open circles; n=7),  
866 M-POMK littermate controls (closed triangles; n=3), and M-POMK KO (open triangles; n=4)  
867 mice. There is no significant difference in M- $\alpha$ -DGN KO vs M-POMK KO as determined by  
868 Student's unpaired t-test at any given lengthening contractions cycle and post lengthening  
869 contractions.

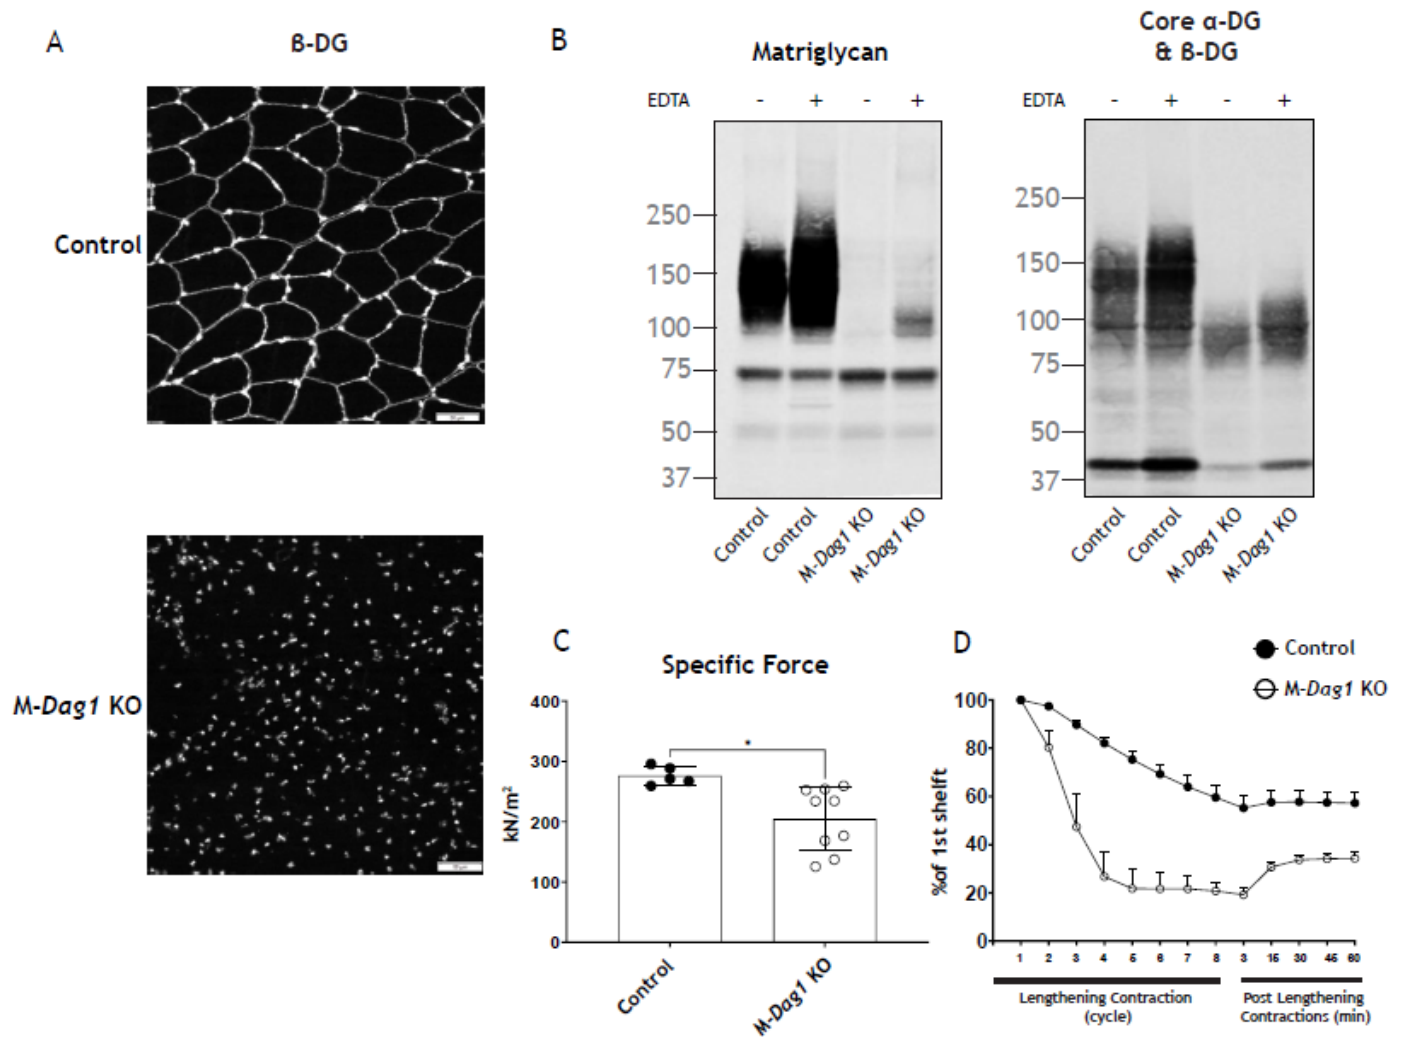

870  
 871 **Figure 5-figure supplement 1. Characteristics of M-Dag1 KO (*Pax7<sup>cre</sup> Dag1<sup>flx/flx</sup>*) mice (A)**  
 872 Immunofluorescence analyses of quadriceps muscles from a 12-week-old WT littermate  
 873 (control) or M-Dag1 KO mouse. Sections were stained to detect β-DG (AP83) and nuclei  
 874 (DAPI). (B) Immunoblot analysis of skeletal muscle from control and M-Dag1 KO mice.  
 875 Glycoproteins were enriched from skeletal muscles (quadriceps) using WGA-agarose with (+)  
 876 and without (-) 10 mM EDTA. Immunoblotting was performed to detect matriglycan (IIIH11)  
 877 and core α-DG and β-DG (AF6868). (C) Specific force in EDL muscles of mice in indicated  
 878 groups; p=0.0128, as determined by Student's unpaired t-test. (D) Force deficit and force  
 879 recovery after eccentric contractions in EDL muscles of 12- to 17-week-old male & female  
 880 control (n=3) and M-Dag1 KO (n=6) mice.

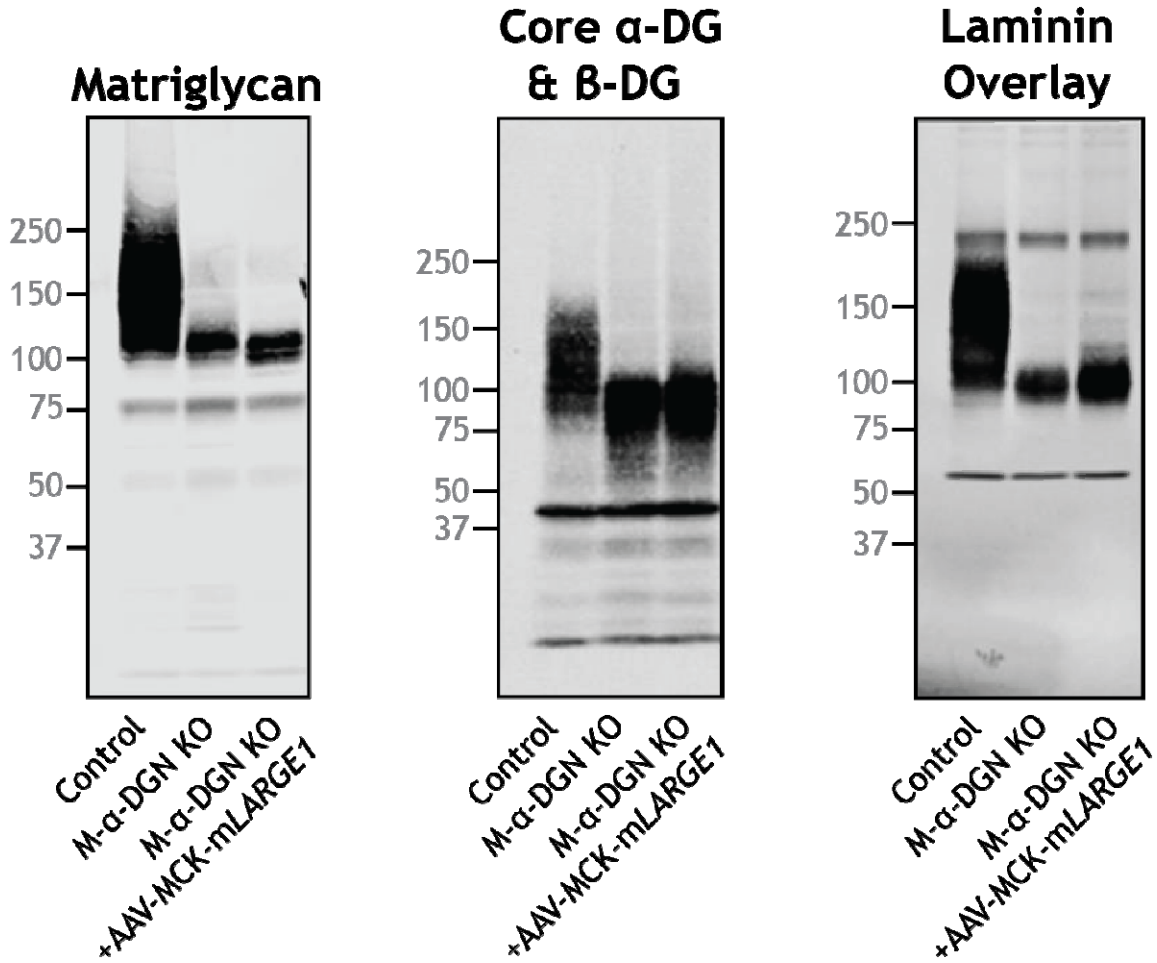

881

882 **Figure 6-figure supplement 1. LARGE1 overexpression does not extend matriglycan on**  
883 **dystroglycan lacking  $\alpha$ -DGN.** AAV-MCK-LARGE1 was injected into the retro-orbital sinus 10-  
884 to-24-week-old M- $\alpha$ -DGN KO mice. Quadriceps skeletal muscle was dissected 10 to 22 weeks  
885 after injection from control, M- $\alpha$ -DGN KO, and M- $\alpha$ -DGN KO+AAV-MCK-mLARGE1 and  
886 used for immunoblotting analysis. Glycoproteins were enriched using WGA-agarose with 10  
887 mM EDTA. Immunoblotting was performed to detect matriglycan (IIIH11), core  $\alpha$ -DG and  $\beta$ -  
888 DG (AF6868), and laminin (overlay). Molecular weight standards in kilodaltons (kDa) are  
889 shown on the left.



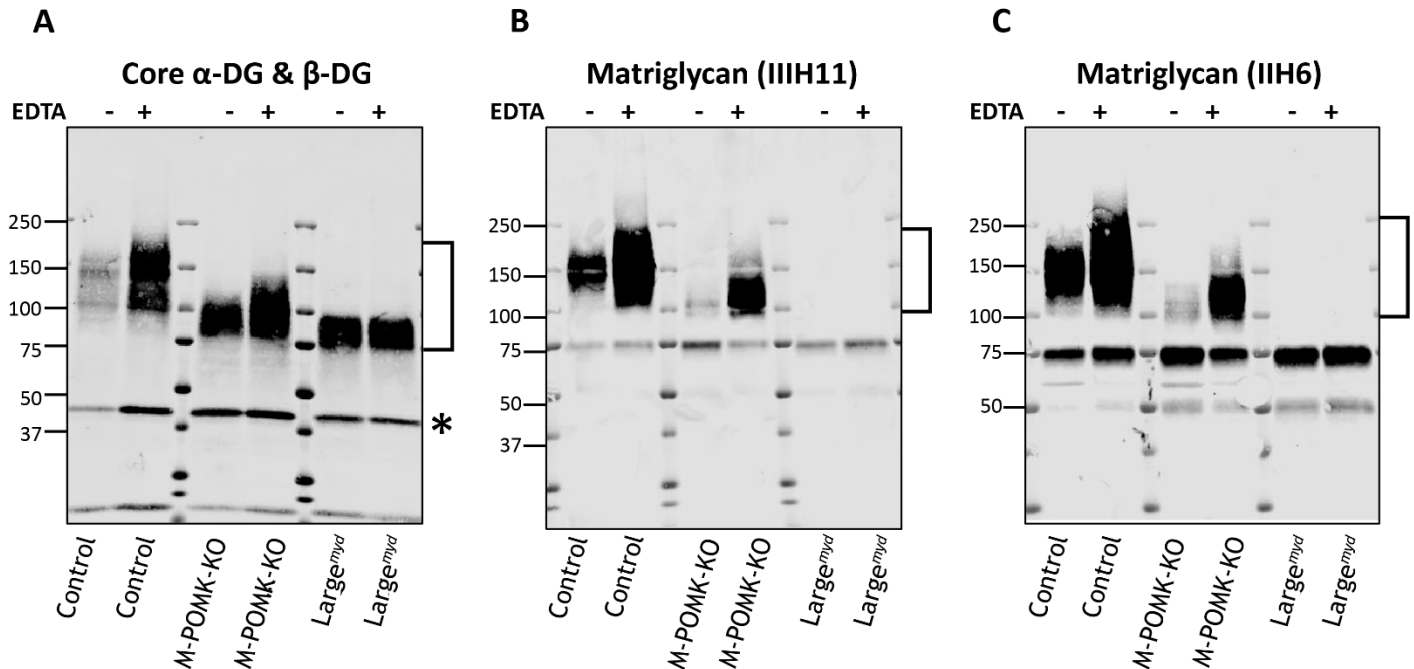

890

891 **Figure 7-figure supplement 1. Effect of EDTA on solubilization of  $\alpha$ -DG from skeletal**  
892 **muscle.** Western blot analysis of DG in glycoprotein-enriched samples of control, M-POMK-  
893 KO, and *Large<sup>myd</sup>* skeletal muscle. Homogenates were prepared with (+) and without (-) 10mM  
894 EDTA (indicated on top) and enriched on WGA-agarose beads. Following washing, WGA-  
895 agarose beads were eluted with Laemmli sample buffer, and samples were loaded onto SDS-  
896 PAGE and blotted onto PVDF-FL membranes. Immunoblotting was performed to detect (A)  
897 core  $\alpha$ -DG &  $\beta$ -DG (AF6868), (B) matriglycan (IIIH11) and (C) matriglycan (IIH6).  $\alpha$ -DG is  
898 labeled with a bracket and varies in apparent molecular weight depending on glycosylation with  
899 matriglycan.  $\beta$ -DG is labeled with an asterisk.
